# Supplementary material for: Design, synthesis and characterization of new 1,2,3-triazolyl pyrazole derivatives as potential antimicrobial agents via a Vilsmeier–Haack reaction approach
Source: Royal Society of Chemistry journal article supplement (doi:10.1039/c6ra06093e), 2016-01-01

## Design, synthesis, characterization of some new 1,2,3-Triazolyl pyrazole derivatives as potential antimicrobial agents -via Vilsmeier-Haack reaction approach

Manjunatha Bhat<sup>a,b</sup>, Nagaraja G.K.<sup>a,\*</sup>, Reshma Kayarmar<sup>a,b</sup>, Peethamber S.K.<sup>c</sup>, Shafi<sup>d</sup>.

<sup>a</sup>Department of Studies in Chemistry, Mangalore University, Mangalagangothri-574199, Karnataka, India

<sup>b</sup>SeQuent Scientific Limited, No:120 A&B, Industrial Area, Baikampady, New Mangalore, Karnataka-575 011, India.

<sup>c</sup>Department of Bio-Chemistry, Jnanasahyadri, Kuvempu University, Shankaraghatta, Karnataka 577 451, India.

<sup>d</sup>Department of PG Studies and Research in Biotechnology and Bioinformatics, Kuvempu University, Jnanasahyadri, Shankaraghatta, Karnataka-577 451, India.

### Supplementary data:

#### <sup>1</sup>H NMR Spectrum of 5 (h)

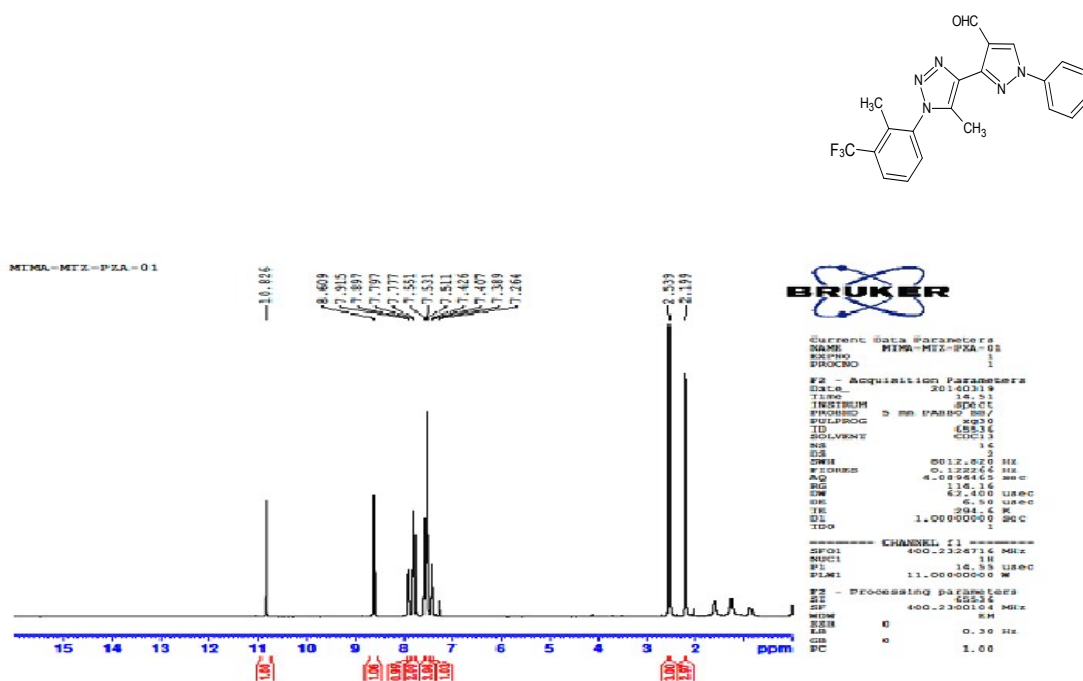

MTMA-MTZ-PZA-01

7.915  
7.897

7.797  
7.777

7.551  
7.531  
7.511

7.426  
7.407  
7.389

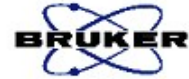

Current Data Parameters  
NAME MTMA-MTZ-PZA-01  
EXPNO 1  
PROCNO 1

F2 - Acquisition Parameters  
Date\_ 20140319  
Time 14.51  
INSTRUM spect  
PROBHD 5 mm PABBO BB/  
PULPROG zg30  
ID 65536  
SOLVENT CDCl3  
NS 16  
DS 2  
SWH 8012.820 Hz  
FIDRES 0.122266 Hz  
AQ 4.0894465 sec  
RG 114.16  
DW 62.400 usec  
DE 6.50 usec  
TE 294.6 K  
D1 1.0000000 sec  
TDO 1

CHANNEL f1  
SFO1 400.2324716 MHz  
NUC1 1H  
P1 14.55 usec  
PLW1 11.00000000 W

F2 - Processing parameters  
SI 65536  
SF 400.2300104 MHz  
WDW EM  
SSB 0  
LB 0.30 Hz  
GB 0  
PC 1.00

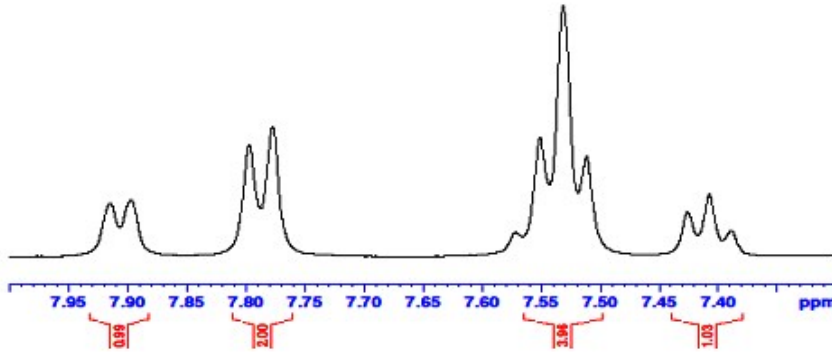

MTMA-MTZ-PZA-01

2.539

2.199

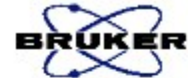

Current Data Parameters  
NAME MTMA-MTZ-PZA-01  
EXPNO 1  
PROCNO 1

F2 - Acquisition Parameters  
Date\_ 20140319  
Time 14.51  
INSTRUM spect  
PROBHD 5 mm PABBO BB/  
PULPROG zg30  
ID 65536  
SOLVENT CDCl3  
NS 16  
DS 2  
SWH 8012.820 Hz  
FIDRES 0.122266 Hz  
AQ 4.0894465 sec  
RG 114.16  
DW 62.400 usec  
DE 6.50 usec  
TE 294.6 K  
D1 1.0000000 sec  
TDO 1

CHANNEL f1  
SFO1 400.2324716 MHz  
NUC1 1H  
P1 14.55 usec  
PLW1 11.00000000 W

F2 - Processing parameters  
SI 65536  
SF 400.2300104 MHz  
WDW EM  
SSB 0  
LB 0.30 Hz  
GB 0  
PC 1.00

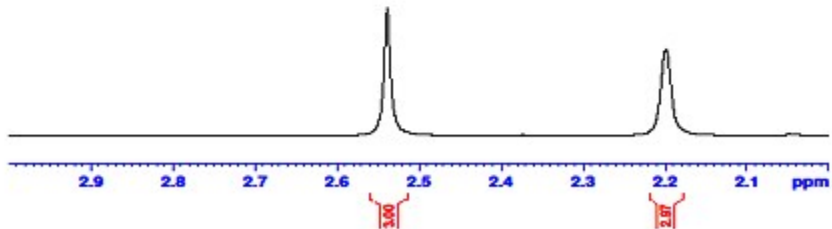

# <sup>13</sup>C NMR Spectrum of 5 (h)

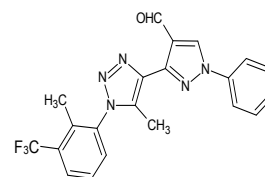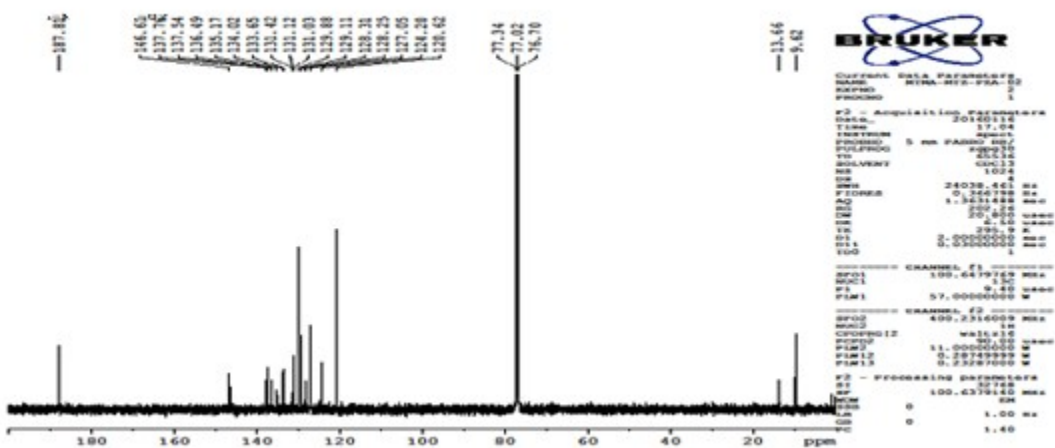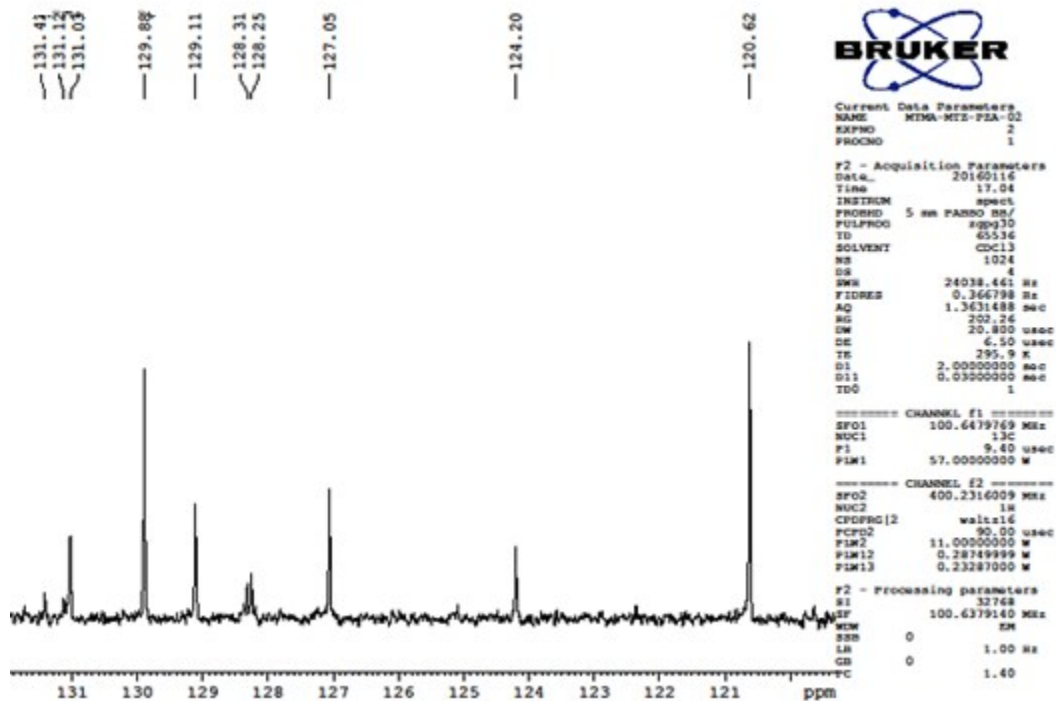

## Mass spectrum of 5 (h)

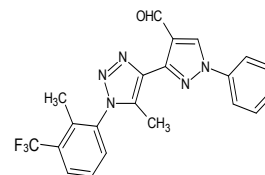

$m/z = 411.4$

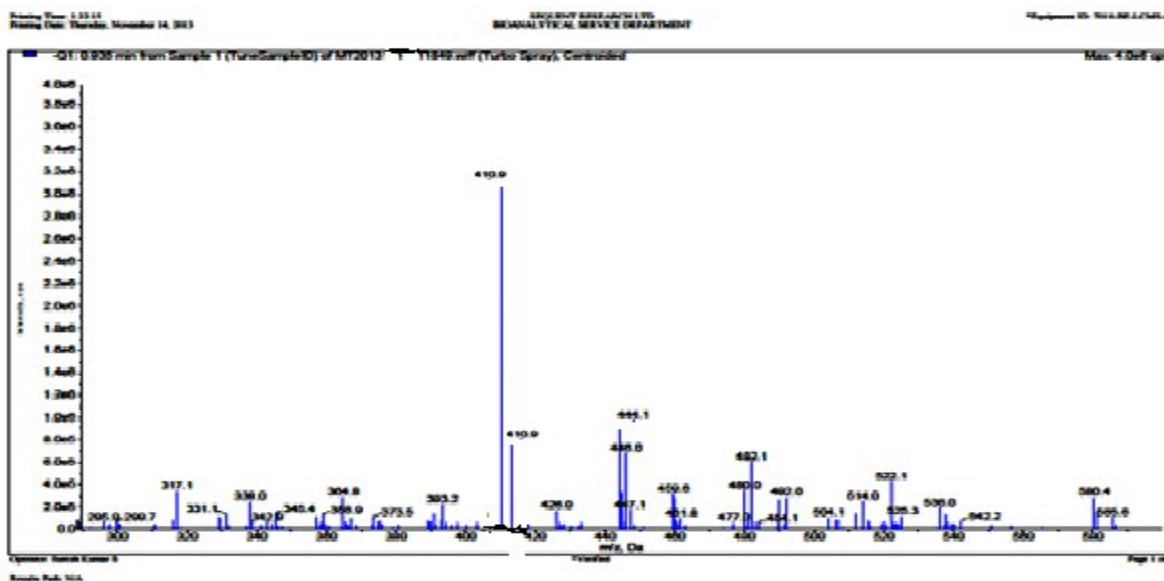

## IR Spectrum of 5 (h)

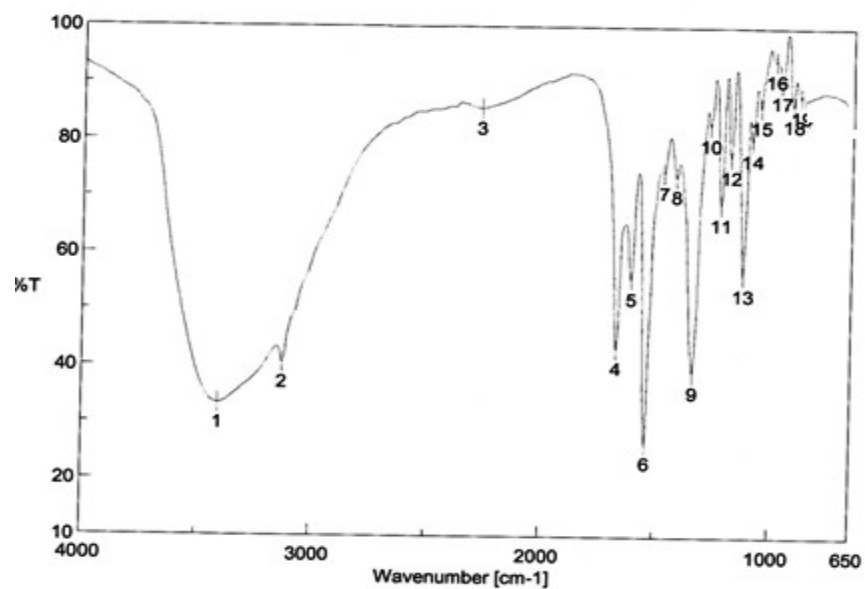

# <sup>1</sup>H NMR Spectrum of 5 (j)

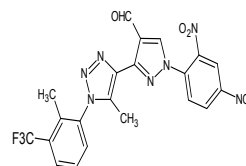

MIMA-MTZ-PZA-03

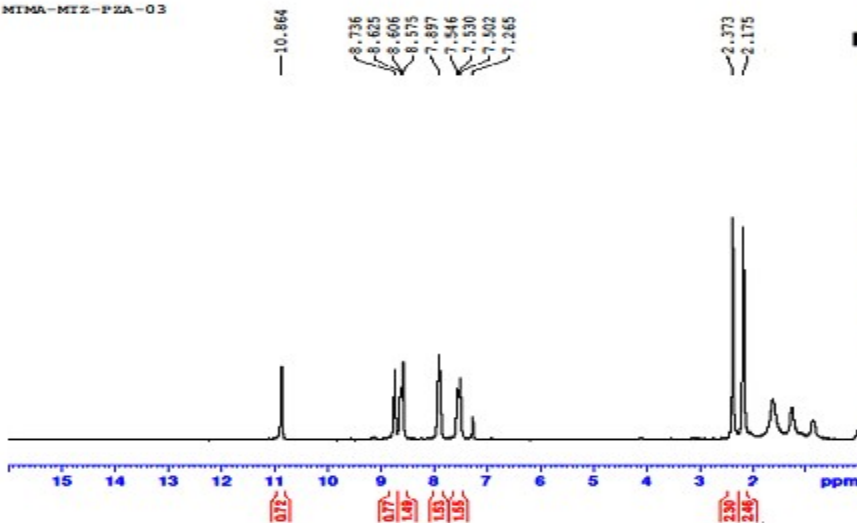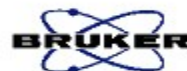

```
Current Data Parameters
NAME      MIMA-MTZ-PZA-03
EXPNO    1
PROCNO   1

F2 - Acquisition Parameters
Date_    20140319
Time     14.56
INSTRUM  spect
PROBHD   5 mm PABBO BB/
PULPROG  zg30
TD        65536
SOLVENT  CDCl3
NS        16
DS        2
SWH       8012.820 Hz
FIDRES    0.122266 Hz
AQ        4.0894465 sec
RG        114.16
SF        62.400 usec
DE        6.50 usec
TE        294.4 K
D1        1.0000000 sec
TD0       1
```

```
----- CHANNEL f1 -----
SFO1     400.2324716 MHz
NUC1     1H
P1       14.55 usec
PLM1     11.0000000 W

F2 - Processing parameters
SI       65536
SF       400.2300097 MHz
WDW      EM
SSB      0
LB       0.30 Hz
GB       0
PC       1.00
```

MIMA-MTZ-PZA-03

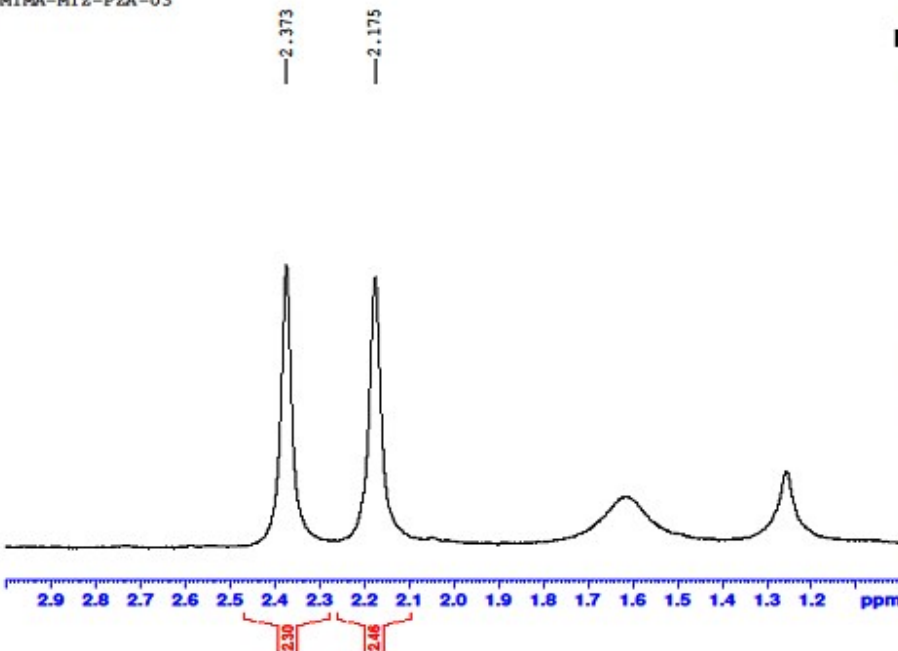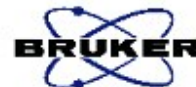

```
Current Data Parameters
NAME      MIMA-MTZ-PZA-03
EXPNO    1
PROCNO   1

F2 - Acquisition Parameters
Date_    20140319
Time     14.56
INSTRUM  spect
PROBHD   5 mm PABBO BB/
PULPROG  zg30
TD        65536
SOLVENT  CDCl3
NS        16
DS        2
SWH       8012.820 Hz
FIDRES    0.122266 Hz
AQ        4.0894465 sec
RG        114.16
SF        62.400 usec
DE        6.50 usec
TE        294.4 K
D1        1.0000000 sec
TD0       1
```

```
----- CHANNEL f1 -----
SFO1     400.2324716 MHz
NUC1     1H
P1       14.55 usec
PLM1     11.0000000 W

F2 - Processing parameters
SI       65536
SF       400.2300097 MHz
WDW      EM
SSB      0
LB       0.30 Hz
GB       0
PC       1.00
```

MIMA-MIZ-PEA-03

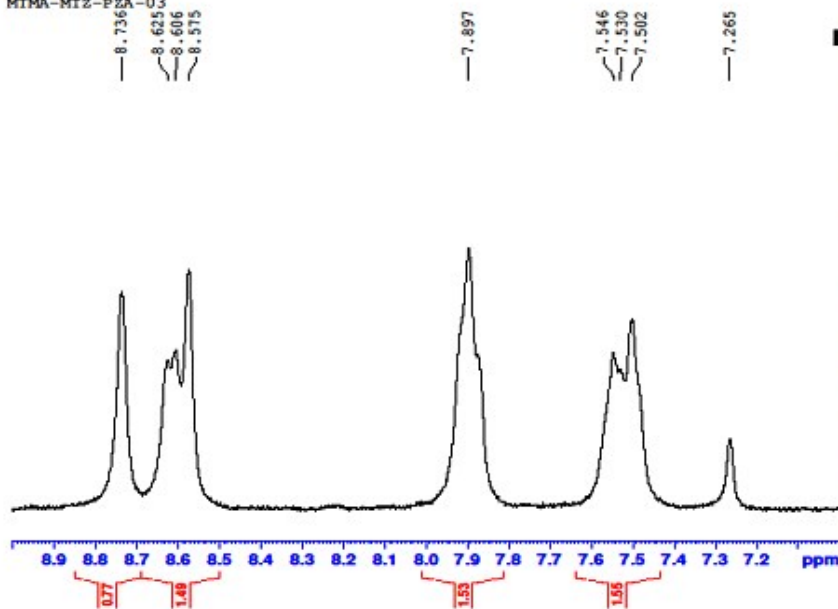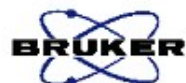

```

Current Data Parameters
NAME      MIMA-MIZ-PEA-03
EXPNO    1
PROCNO   1

F2 - Acquisition Parameters
Date_    20140319
Time     14.56
INSTRUM  spect
PROBHD   5 mm PARRO BB/
PULPROG  zg30
TD        65536
SOLVENT  CDC13
NS        16
DS        2
SWH       8012.820 Hz
FIDRES   0.122266 Hz
AQ        4.889465 sec
RG        114.16
DW        62.400 usec
DE        6.50 usec
TE        294.6 K
D1        1.0000000 sec
TDO       1

----- CHANNEL f1 -----
SFO1     400.2324716 MHz
NUC1      1H
P1        14.53 usec
PLN1     11.0000000 W

F2 - Processing parameters
SI        65536
SF        400.2300097 MHz
WDW       EM
SSB       0
LB        0.30 Hz
GB        0
PC        1.00
    
```

<sup>13</sup>C NMR Spectrum of 5 (j)

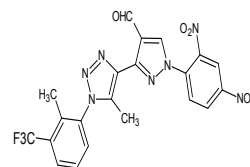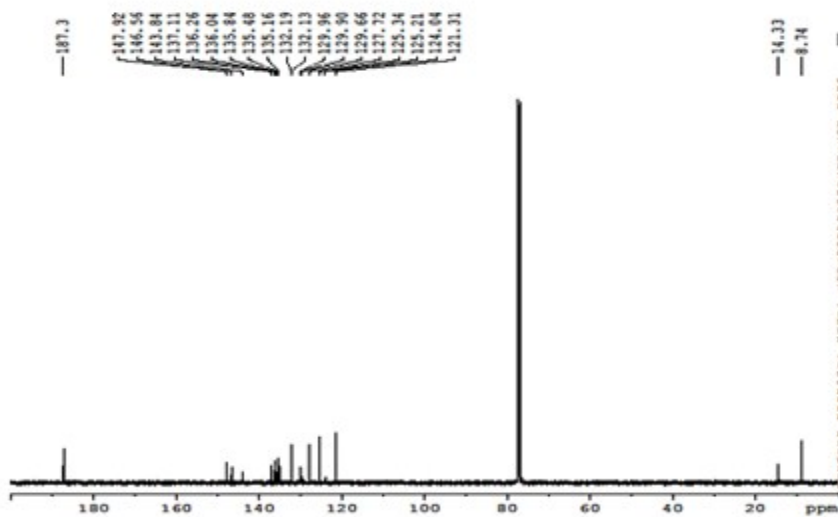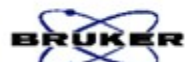

```

Current Data Parameters
NAME      MIZ-PEA-04
EXPNO    1
PROCNO   1

F2 - Acquisition Parameters
Date_    20151224
Time     13.44
INSTRUM  spect
PROBHD   5 mm PARRO BB/
PULPROG  zgpg30
TD        65536
SOLVENT  CDCl3
NS        1024
DS        4
SWH       24038.460 Hz
FIDRES   0.346788 Hz
AQ        1.363188 sec
RG        200.26
DW        20.400 usec
DE        2.50 usec
TE        300.2 K
D1        2.0000000 sec
D11       0.5300000 sec
TDO       1

----- CHANNEL f1 -----
SFO1     100.627969 MHz
NUC1      13C
P1        9.40 usec
PLN1     57.0000000 W

----- CHANNEL f2 -----
SFO2     400.2316009 MHz
NUC2      1H
CPDPRG12 waltz16
PROBHD   5 mm
PULPROG  zgpg30
PLN2     11.0000000 W
PLN12    0.28789999 W
PLN13    0.23287000 W

F2 - Processing parameters
SI        32768
SF        100.6279140 MHz
WDW       EM
SSB       0
LB        1.00 Hz
GB        0
PC        1.40
    
```

## Mass spectrum of 5 (j)

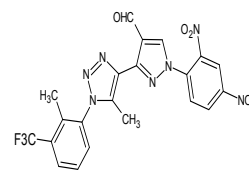

$m/z = 501.4$

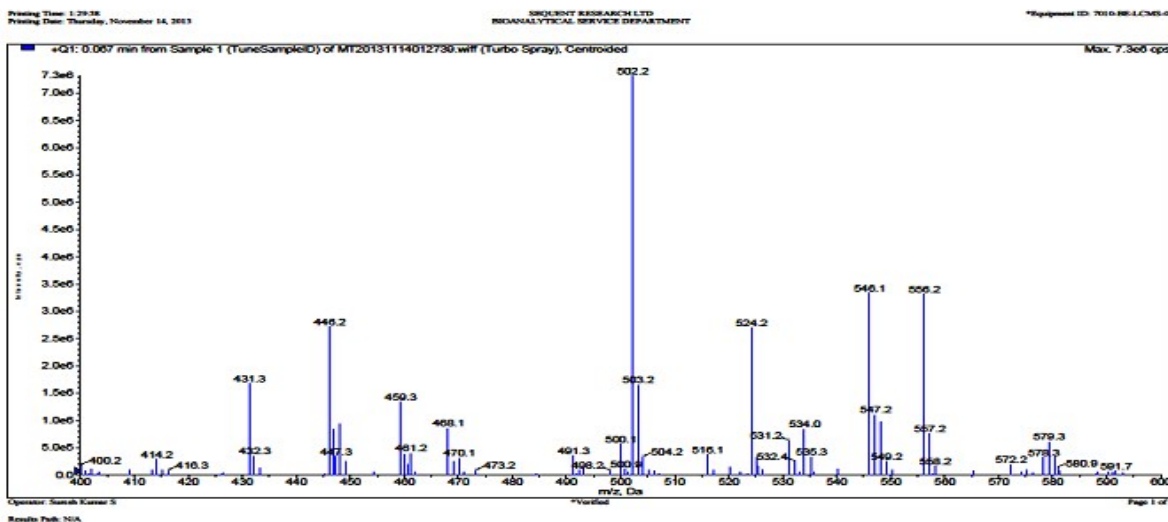

## IR Spectrum of 5 (j)

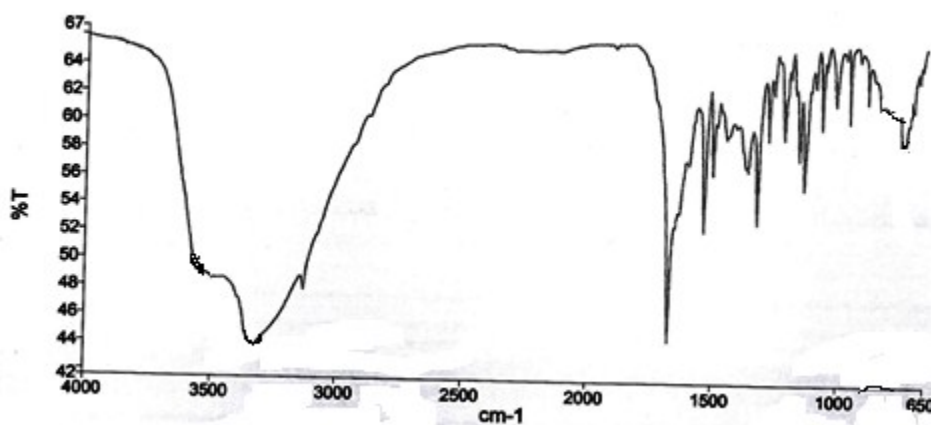

# <sup>1</sup>H NMR Spectrum of 5 (i)

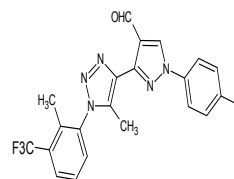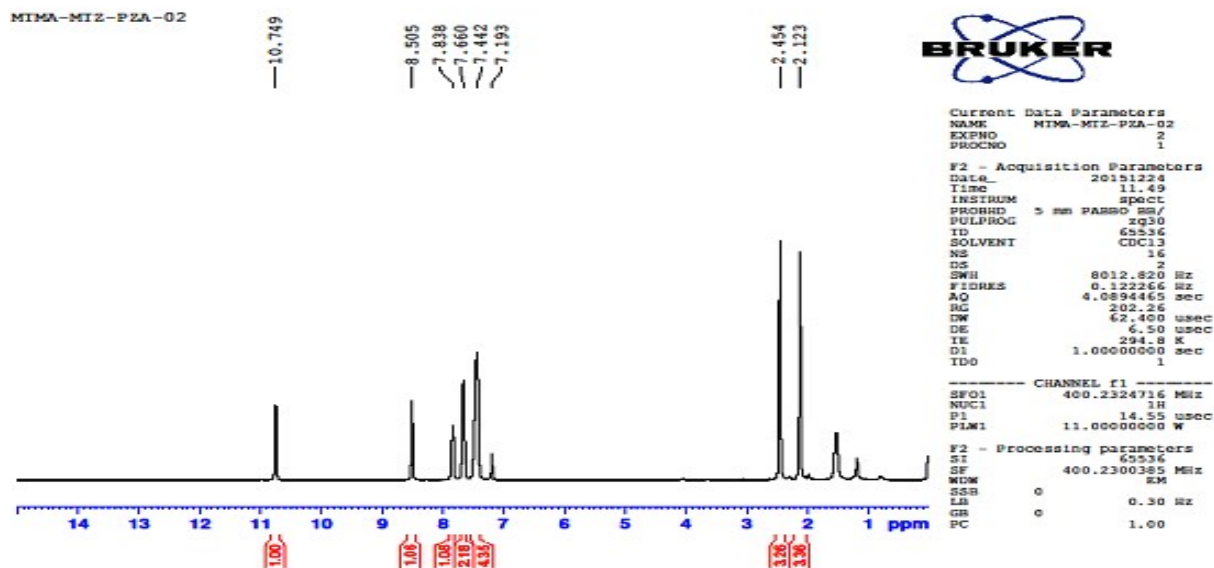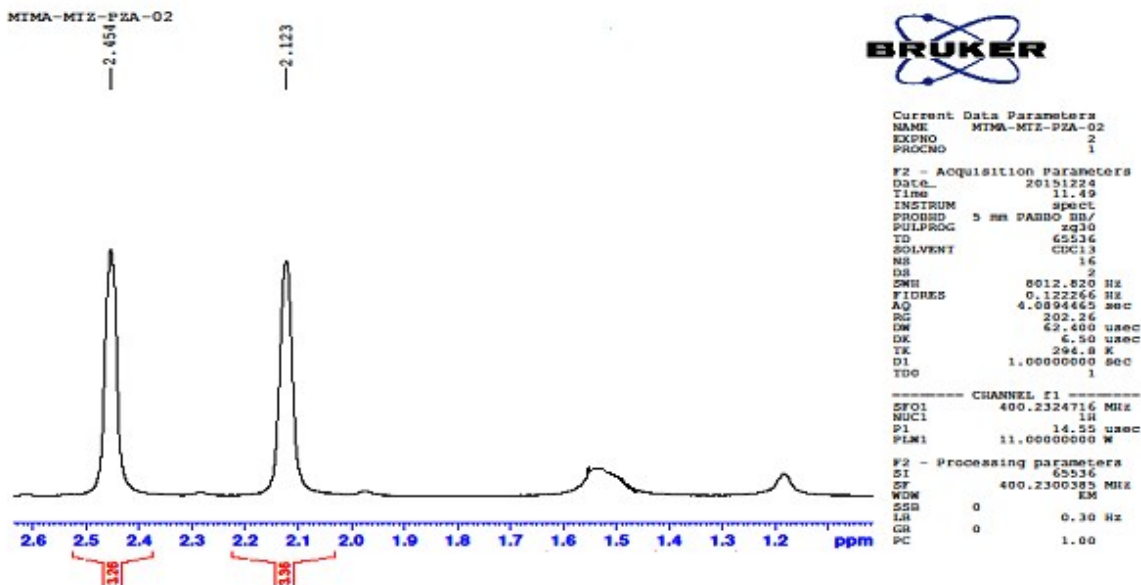



M1MA-M1Z-PZA-02

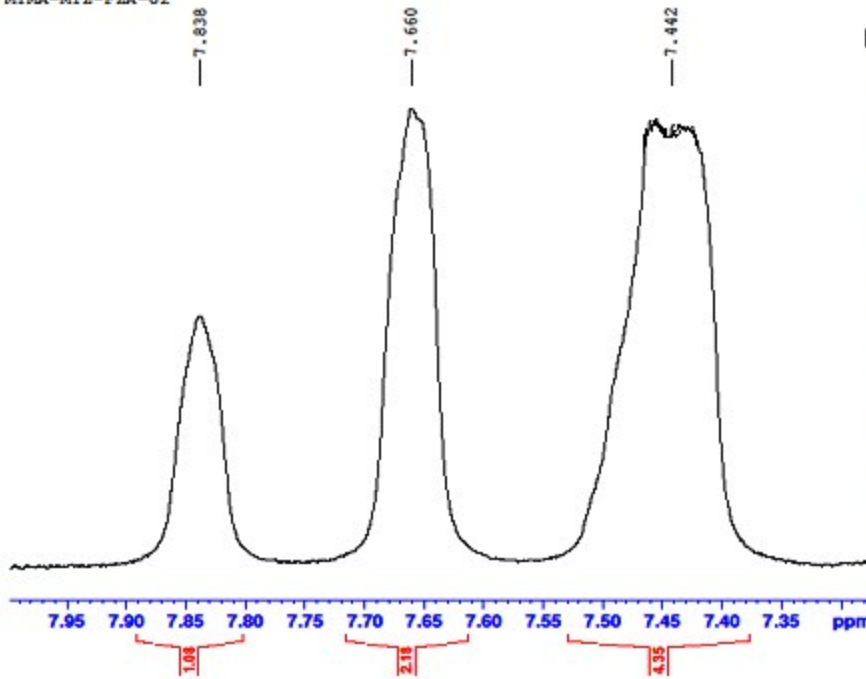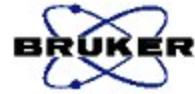

Current Data Parameters  
 NAME M1MA-M1Z-PZA-02  
 EXPNO 2  
 PROCNO 1

F2 - Acquisition Parameters  
 Date\_ 20151224  
 Time 11.49  
 INSTRUM spect  
 PROBRD 5 mm PARBO BB/  
 PULPROG zg30  
 ID 65536  
 SOLVENT CDCl3  
 NS 16  
 DS 2  
 SWH 8012.820 Hz  
 FIDRES 0.122266 Hz  
 AQ 4.089485 sec  
 RG 202.26  
 DW 62.400 usec  
 DE 6.50 usec  
 TE 294.8 K  
 D1 1.0000000 sec  
 TDD 1

----- CHANNEL f1 -----  
 SFO1 400.2324716 MHz  
 NUC1 1H  
 P1 14.55 usec  
 PLW1 11.00000000 W

F2 - Processing parameters  
 SI 65536  
 SF 400.2300385 MHz  
 MDW EM  
 SSB 0  
 LB 0.30 Hz  
 GB 0  
 PC 1.00

<sup>13</sup>C NMR Spectrum of 5 (i)

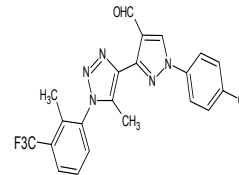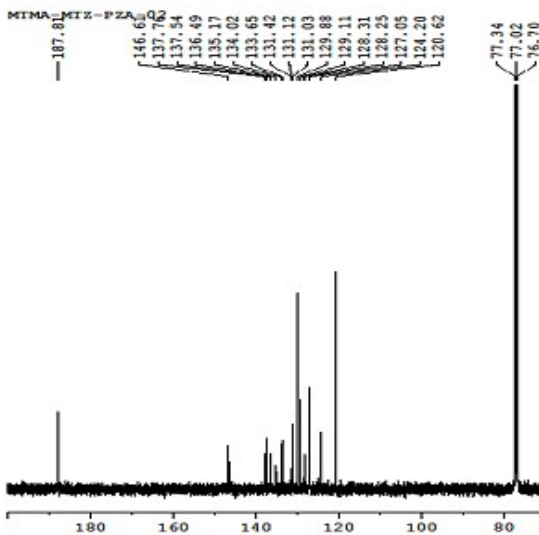

13.66  
9.62

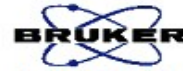

Current Data Parameters  
 NAME M1MA-M1Z-PZA-02  
 EXPNO 2  
 PROCNO 1

F2 - Acquisition Parameters  
 Date\_ 20160116  
 Time 17.04  
 INSTRUM spect  
 PROBRD 5 mm PARBO BB/  
 PULPROG zgpg30  
 ID 65536  
 SOLVENT CDCl3  
 NS 1024  
 DS 4  
 SWH 24038.461 Hz  
 FIDRES 0.366798 Hz  
 AQ 1.3631488 sec  
 RG 202.26  
 DW 20.800 usec  
 DE 6.50 usec  
 TE 293.9 K  
 D1 2.0000000 sec  
 D11 0.0300000 sec  
 TDD 1

----- CHANNEL f1 -----  
 SFO1 100.6479169 MHz  
 NUC1 13C  
 P1 9.40 usec  
 PLW1 57.00000000 W

----- CHANNEL f2 -----  
 SFO2 400.2316009 MHz  
 NUC2 1H  
 CPDPRG12 waltz16  
 PCPD2 80.00 usec  
 P1W2 11.00000000 W  
 P1W12 0.28749999 W  
 P1W13 0.23287000 W

F2 - Processing parameters  
 SI 32768  
 SF 100.6379140 MHz  
 MDW EM  
 SSB 0  
 LB 1.00 Hz  
 GB 0  
 PC 1.40

MIMA-MTZ-PZA-02

131.42  
131.12  
131.03  
129.88  
129.11  
128.31  
128.25

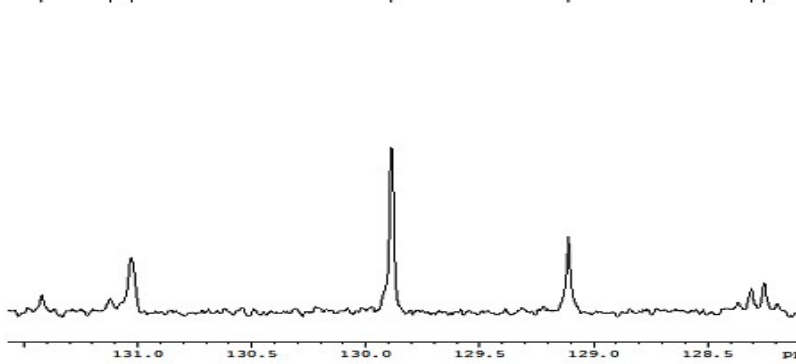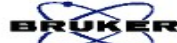

Current Data Parameters  
 NAME: MIMA-MTZ-PZA-02  
 EXPNO: 1  
 PROCNO: 1  
 F2 - Acquisition Parameters  
 Date\_: 20160116  
 Time: 17.04  
 INSTRUM: spect  
 PROBRD: 5 mm PABBO BB7  
 PULPROG: zgpg30  
 TD: 65536  
 SOLVENT: CDCl3  
 NS: 1024  
 DS: 4  
 SWH: 24038.463 Hz  
 FIDRES: 0.366798 Hz  
 AQ: 1.3631488 sec  
 RG: 250.24  
 DW: 20.800 usec  
 DE: 6.50 usec  
 TE: 295.2 K  
 D1: 2.0000000 sec  
 D11: 0.0300000 sec  
 TDD: 1  
 ===== CHANNEL F1 =====  
 SFO1: 100.6479769 MHz  
 NUQ1: 13C  
 P1: 9.40 usec  
 PLW1: 57.0000000 W  
 ===== CHANNEL F2 =====  
 SFO2: 400.2316009 MHz  
 NUQ2: 1H  
 CPDPRG2: waltz16  
 FREQ2: 11.0000000 usec  
 P12: 11.0000000 usec  
 P1M2: 0.28749999 W  
 P1M3: 0.23287000 W  
 F2 - Processing parameters  
 SI: 32768  
 SF: 100.6379120 MHz  
 MDW: 0 EM  
 SSB: 0  
 LB: 1.00 Hz  
 GB: 0  
 PC: 1.40

MIMA-MTZ-PZA-02

131.42  
131.12  
131.03  
129.88  
129.11  
128.31  
128.25  
127.05  
124.20  
120.62

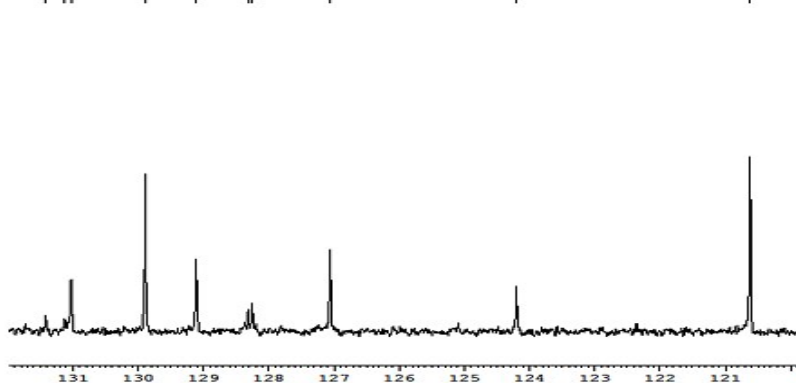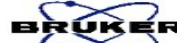

Current Data Parameters  
 NAME: MIMA-MTZ-PZA-02  
 EXPNO: 1  
 PROCNO: 1  
 F2 - Acquisition Parameters  
 Date\_: 20160116  
 Time: 17.04  
 INSTRUM: spect  
 PROBRD: 5 mm PABBO BB7  
 PULPROG: zgpg30  
 TD: 65536  
 SOLVENT: CDCl3  
 NS: 1024  
 DS: 4  
 SWH: 24038.463 Hz  
 FIDRES: 0.366798 Hz  
 AQ: 1.3631488 sec  
 RG: 250.24  
 DW: 20.800 usec  
 DE: 6.50 usec  
 TE: 295.2 K  
 D1: 2.0000000 sec  
 D11: 0.0300000 sec  
 TDD: 1  
 ===== CHANNEL F1 =====  
 SFO1: 100.6479769 MHz  
 NUQ1: 13C  
 P1: 9.40 usec  
 PLW1: 57.0000000 W  
 ===== CHANNEL F2 =====  
 SFO2: 400.2316009 MHz  
 NUQ2: 1H  
 CPDPRG2: waltz16  
 FREQ2: 11.0000000 usec  
 P12: 11.0000000 usec  
 P1M2: 0.28749999 W  
 P1M3: 0.23287000 W  
 F2 - Processing parameters  
 SI: 32768  
 SF: 100.6379120 MHz  
 MDW: 0 EM  
 SSB: 0  
 LB: 1.00 Hz  
 GB: 0  
 PC: 1.40

MIMA-MTZ-PZA-02

137.76  
137.54  
136.49  
135.17  
134.02  
133.65

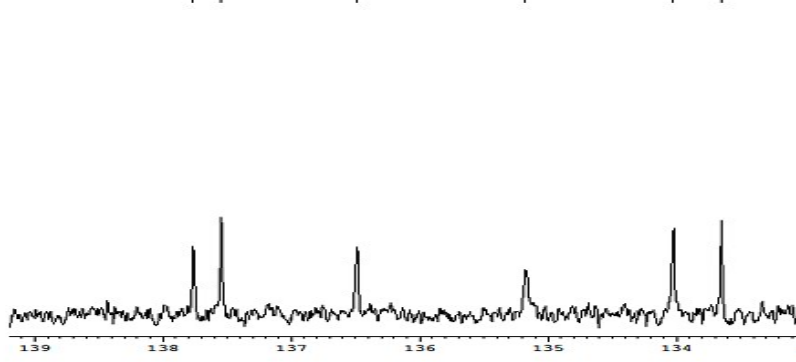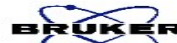

Current Data Parameters  
 NAME: MIMA-MTZ-PZA-02  
 EXPNO: 1  
 PROCNO: 1  
 F2 - Acquisition Parameters  
 Date\_: 20160116  
 Time: 17.04  
 INSTRUM: spect  
 PROBRD: 5 mm PABBO BB7  
 PULPROG: zgpg30  
 TD: 65536  
 SOLVENT: CDCl3  
 NS: 1024  
 DS: 4  
 SWH: 24038.463 Hz  
 FIDRES: 0.366798 Hz  
 AQ: 1.3631488 sec  
 RG: 250.24  
 DW: 20.800 usec  
 DE: 6.50 usec  
 TE: 295.2 K  
 D1: 2.0000000 sec  
 D11: 0.0300000 sec  
 TDD: 1  
 ===== CHANNEL F1 =====  
 SFO1: 100.6479769 MHz  
 NUQ1: 13C  
 P1: 9.40 usec  
 PLW1: 57.0000000 W  
 ===== CHANNEL F2 =====  
 SFO2: 400.2316009 MHz  
 NUQ2: 1H  
 CPDPRG2: waltz16  
 FREQ2: 11.0000000 usec  
 P12: 11.0000000 usec  
 P1M2: 0.28749999 W  
 P1M3: 0.23287000 W  
 F2 - Processing parameters  
 SI: 32768  
 SF: 100.6379120 MHz  
 MDW: 0 EM  
 SSB: 0  
 LB: 1.00 Hz  
 GB: 0  
 PC: 1.40

## Mass spectrum of 5 (i)

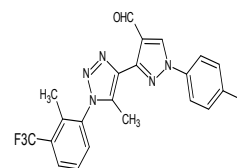

$m/z = 445.8$

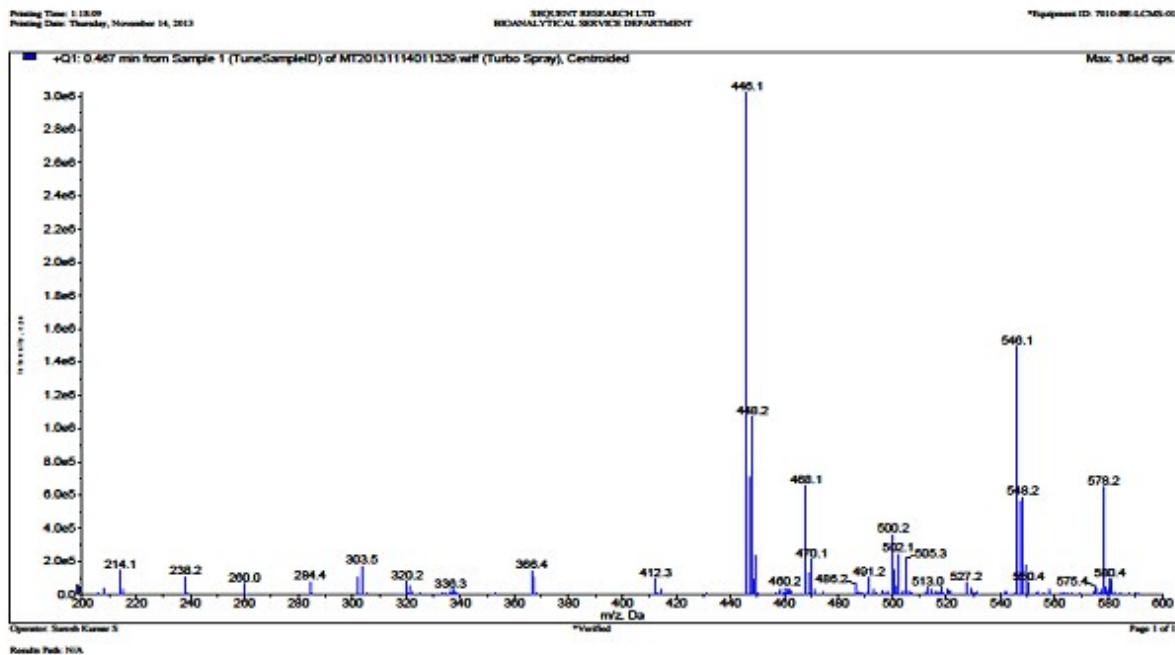

## IR Spectrum of 5 (i)

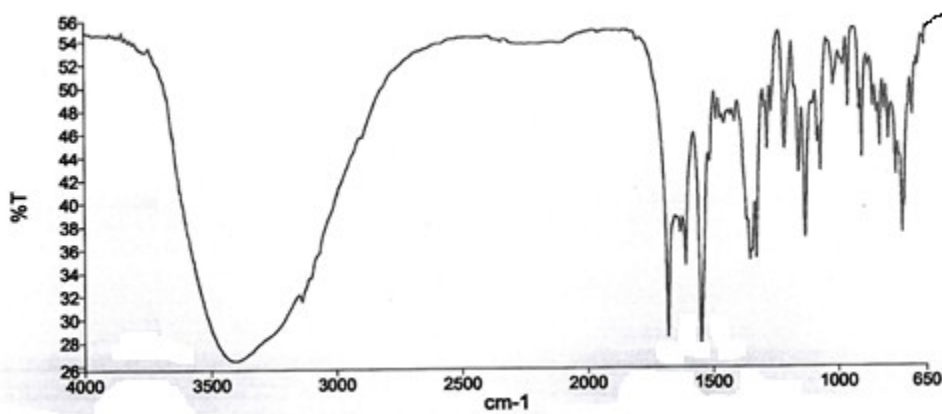

# <sup>1</sup>H NMR Spectrum of 5 (m)

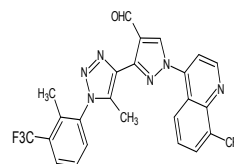

MTZ-PZA-06

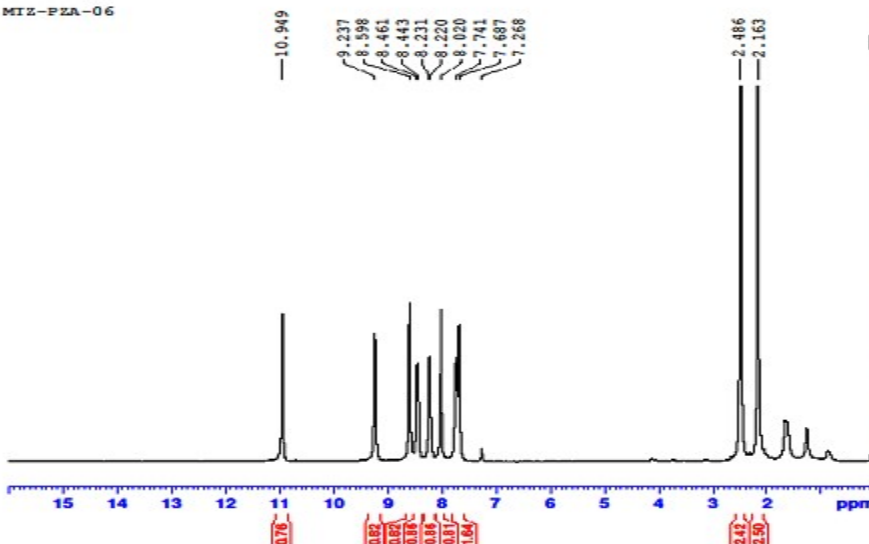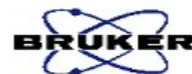

Current Data Parameters  
NAME MTZ-PZA-06  
EXPNO 1  
PROCNO 1

F2 - Acquisition Parameters  
Date\_ 20140319  
Time 15.00  
INSTRUM spect  
PROBHD 5 mm PABBO BB/  
PULPROG zg30  
TD 65536  
SOLVENT CDCl3  
NS 1  
DS 2  
SWH 8012.820 Hz  
FIDRES 0.122266 Hz  
AQ 4.0894465 sec  
RG 114.16  
DW 62.400 usec  
DE 6.50 usec  
TE 294.5 K  
D1 1.00000000 sec  
TD0 1

CHANNEL f1  
SFO1 400.2324716 MHz  
NUC1 1H  
P1 14.55 usec  
PLM1 11.00000000 W

F2 - Processing parameters  
SI 65536  
SF 400.2300083 MHz  
WDW EM  
SSB 0  
LB 0.30 Hz  
GB 0  
PC 1.00

MTZ-PZA-06

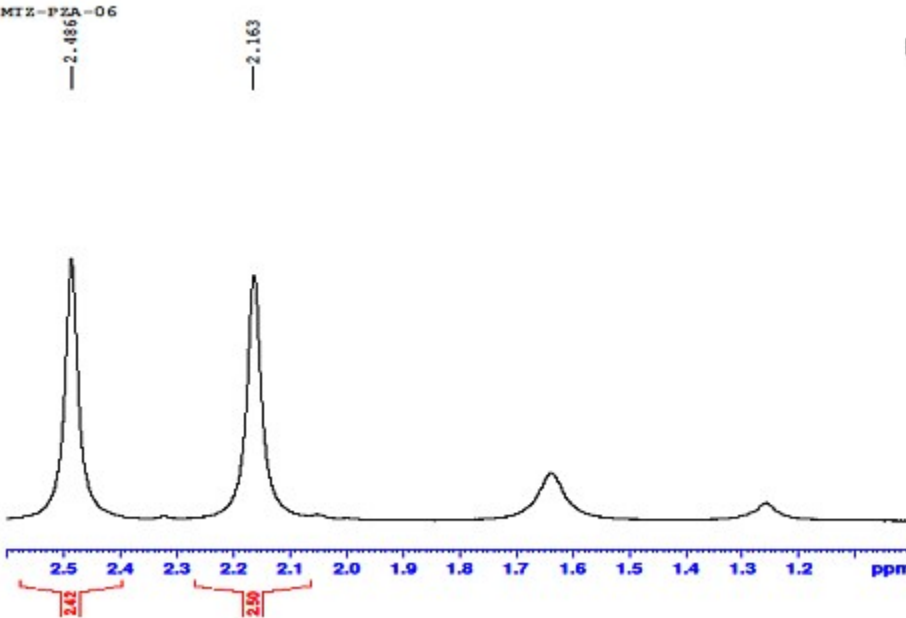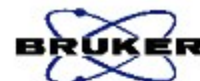

Current Data Parameters  
NAME MTZ-PZA-06  
EXPNO 1  
PROCNO 1

F2 - Acquisition Parameters  
Date\_ 20140319  
Time 15.00  
INSTRUM spect  
PROBHD 5 mm PABBO BB/  
PULPROG zg30  
TD 65536  
SOLVENT CDCl3  
NS 1  
DS 2  
SWH 8012.820 Hz  
FIDRES 0.122266 Hz  
AQ 4.0894465 sec  
RG 114.16  
DW 62.400 usec  
DE 6.50 usec  
TE 294.5 K  
D1 1.00000000 sec  
TD0 1

CHANNEL f1  
SFO1 400.2324716 MHz  
NUC1 1H  
P1 14.55 usec  
PLM1 11.00000000 W

F2 - Processing parameters  
SI 65536  
SF 400.2300083 MHz  
WDW EM  
SSB 0  
LB 0.30 Hz  
GB 0  
PC 1.00

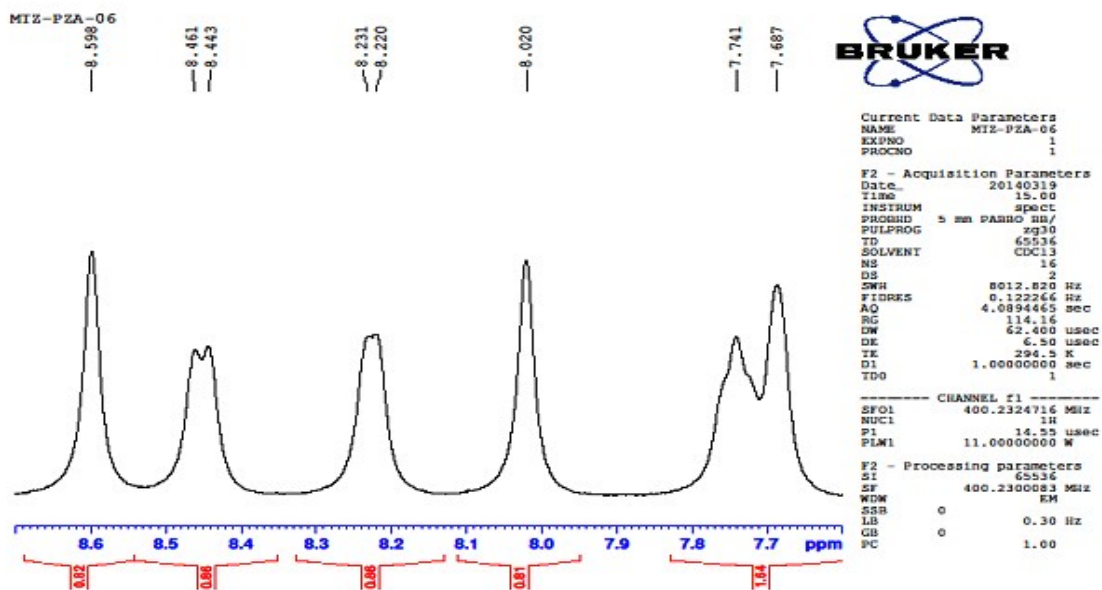

<sup>13</sup>C NMR Spectrum of 5 (m)

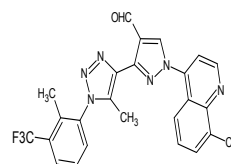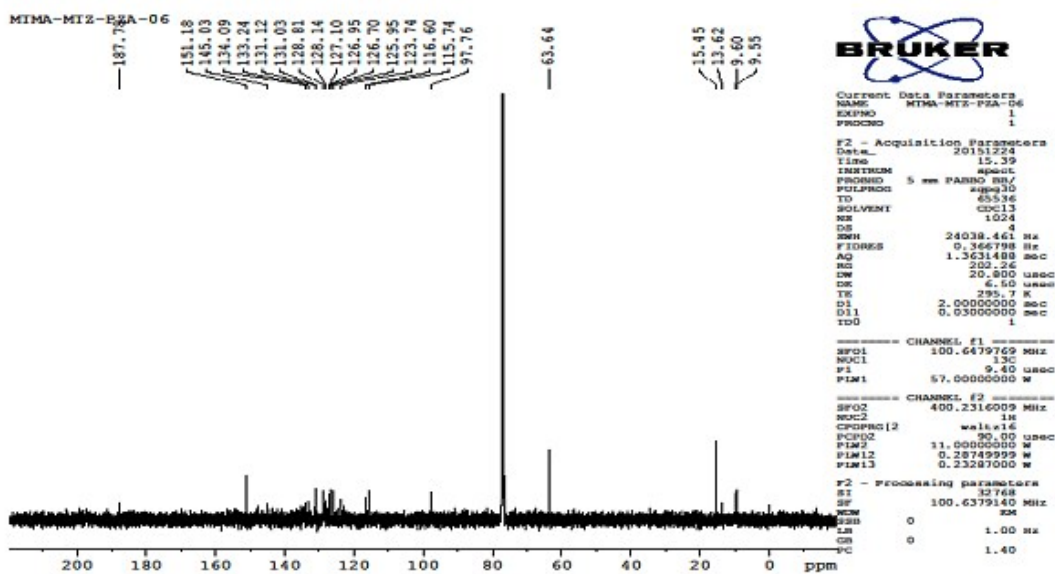



## Mass spectrum of 5 (m)

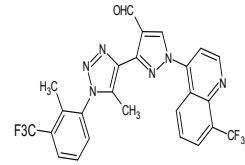

$m/z = 530.4$

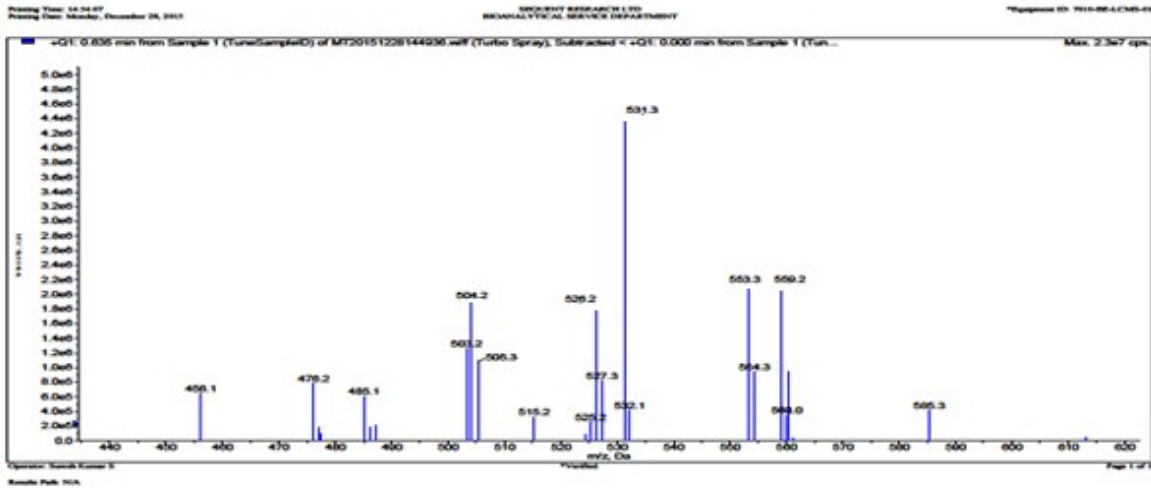

## IR spectrum of 5 (m)

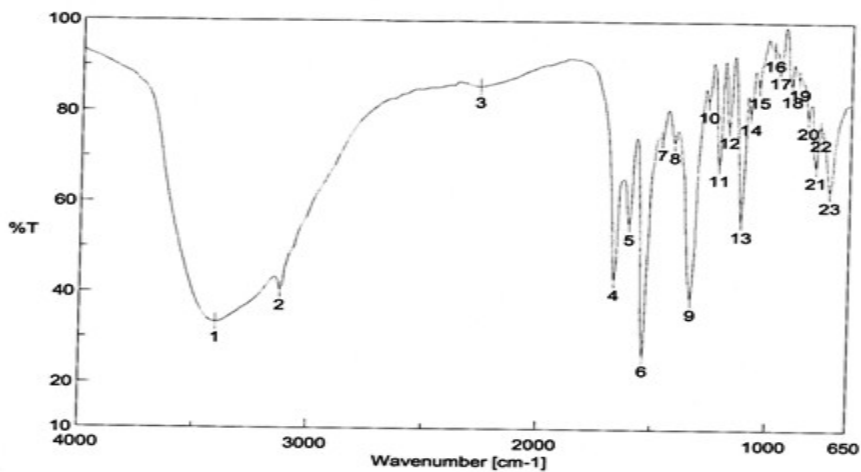

# <sup>1</sup>H NMR Spectrum of 5 (l)

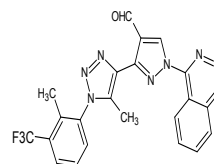

MTMA-MTZ-PZA-05

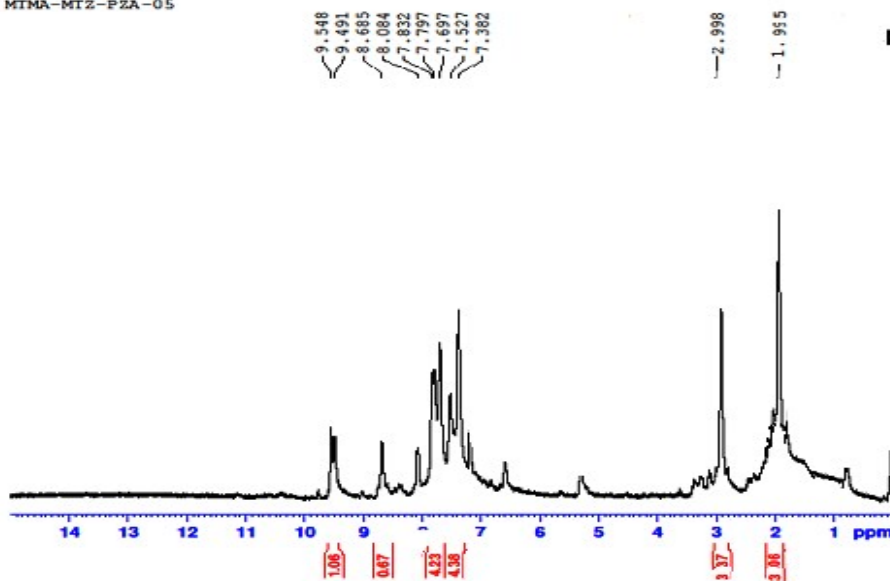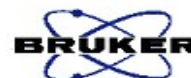

Current Data Parameters  
 NAME MTMA-MTZ-PZA-05  
 EXPNO 1  
 PROCNO 1

F2 - Acquisition Parameters  
 Date\_ 20151224  
 Time 12.43  
 INSTRUM spect  
 PROBRD 5 mm PABBO BB/  
 PULPROG zg30  
 TD 65536  
 SOLVENT CDCl3  
 NS 16  
 DS 2  
 SWH 8012.820 Hz  
 FIDRES 0.122266 Hz  
 AQ 4.0894665 sec  
 RG 180.44  
 DW 62.400 usec  
 DE 6.50 usec  
 TE 294.8 K  
 D1 1.00000000 sec  
 TDO 1

CHANNEL f1  
 SF01 400.2324716 MHz  
 NUC1 1H  
 P1 14.55 usec  
 PLW1 11.00000000 W

F2 - Processing parameters  
 SI 65536  
 SF 400.2300372 MHz  
 WDW EM  
 SSB 0  
 LB 0.30 Hz  
 GB 0  
 PC 1.00

MTMA-MTZ-PZA-05

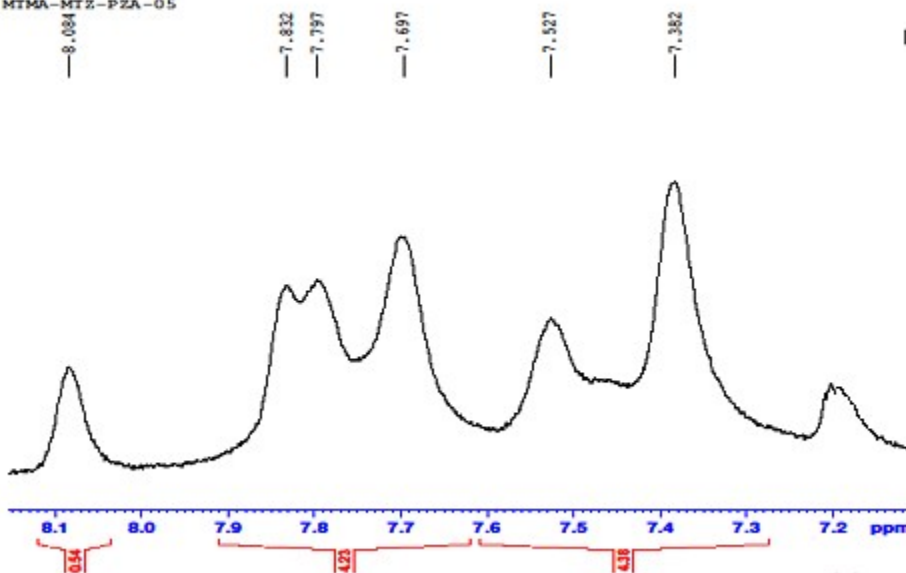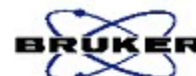

Current Data Parameters  
 NAME MTMA-MTZ-PZA-05  
 EXPNO 1  
 PROCNO 1

F2 - Acquisition Parameters  
 Date\_ 20151224  
 Time 12.43  
 INSTRUM spect  
 PROBRD 5 mm PABBO BB/  
 PULPROG zg30  
 TD 65536  
 SOLVENT CDCl3  
 NS 16  
 DS 2  
 SWH 8012.820 Hz  
 FIDRES 0.122266 Hz  
 AQ 4.0894665 sec  
 RG 180.44  
 DW 62.400 usec  
 DE 6.50 usec  
 TE 294.8 K  
 D1 1.00000000 sec  
 TDO 1

CHANNEL f1  
 SF01 400.2324716 MHz  
 NUC1 1H  
 P1 14.55 usec  
 PLW1 11.00000000 W

F2 - Processing parameters  
 SI 65536  
 SF 400.2300372 MHz  
 WDW EM  
 SSB 0  
 LB 0.30 Hz  
 GB 0  
 PC 1.00



# <sup>13</sup>C NMR Spectrum of 5 (I)

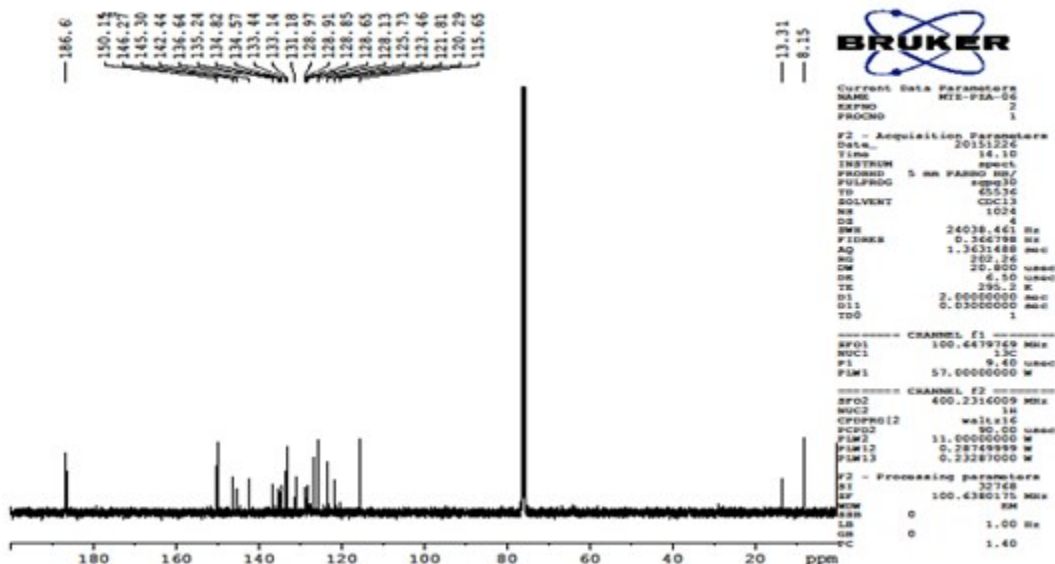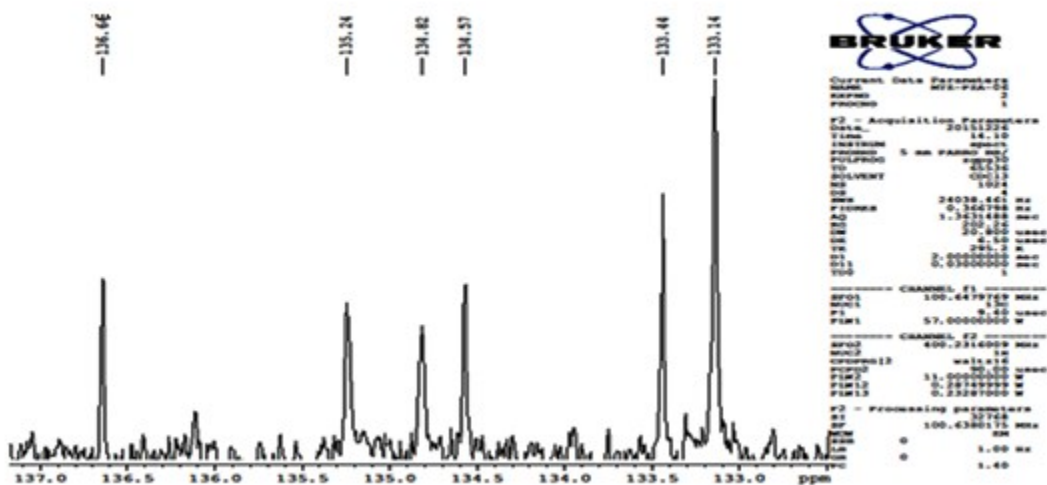

## Mass spectrum of 5 (I)

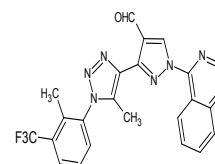

$m/z = 463.4$

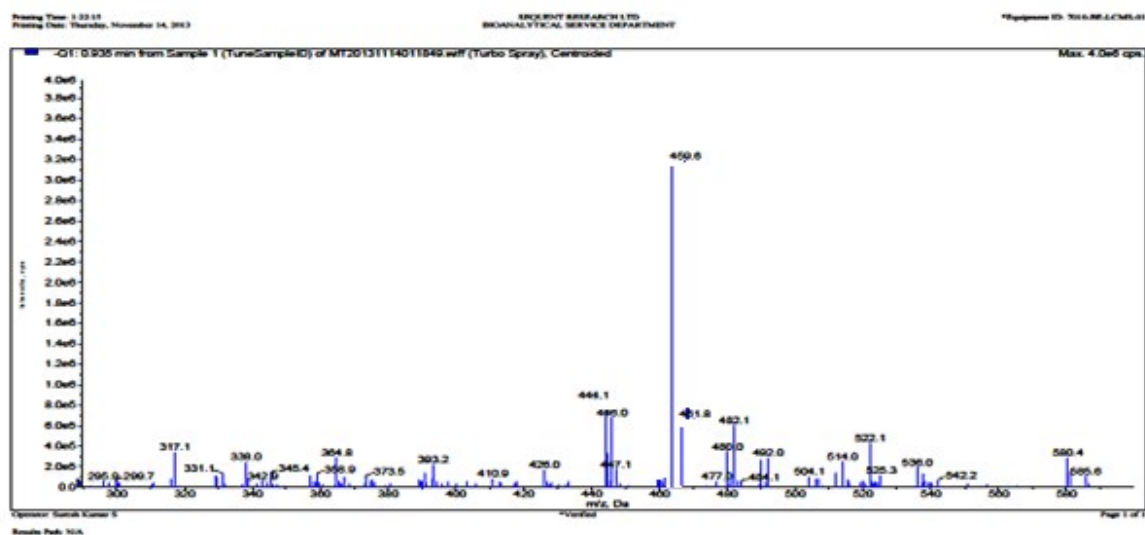

## IR spectrum of 5 (I)

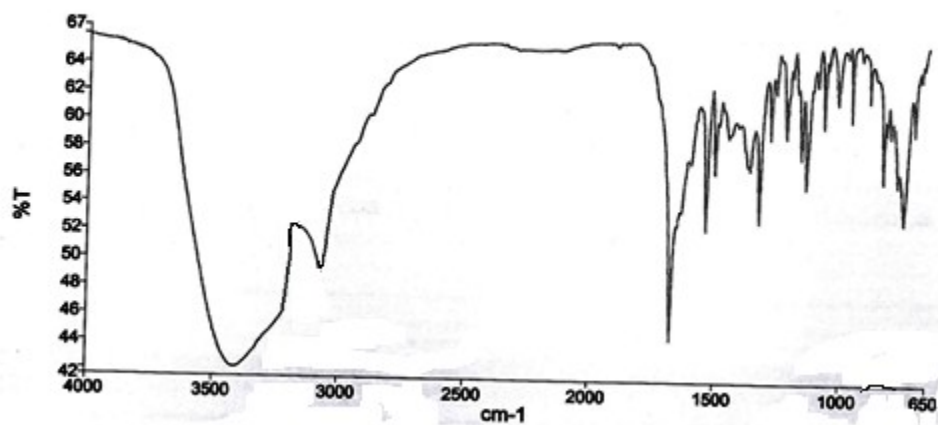

# <sup>1</sup>H NMR Spectrum of 5 (c)

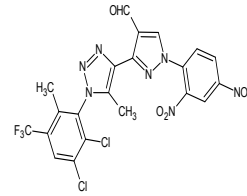

MTZ-PZA-04

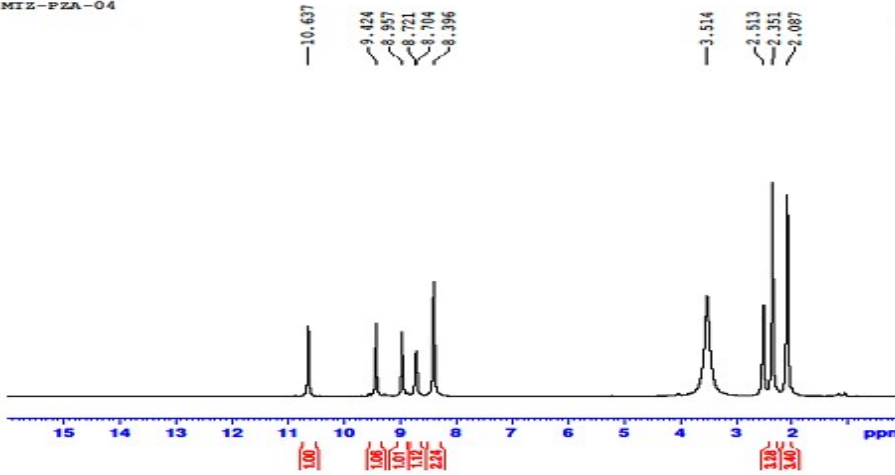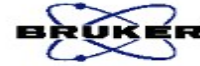

Current Data Parameters  
 NAME: MTZ-PZA-04  
 EXPNO: 1  
 PROCNO: 1

F2 - Acquisition Parameters  
 Date\_: 20140319  
 TIME: 15.05  
 INSTRUM: spect  
 PROBHD: 5 mm PABBO BB7  
 PULPROG: zgpg30  
 ID: 65536  
 SOLVENT: DMSO  
 NS: 16  
 DS: 2  
 SWH: 8012.820 Hz  
 FIDRES: 0.122266 Hz  
 AQ: 4.083463 sec  
 RG: 79.47  
 DW: 62.400 usec  
 DE: 6.50 usec  
 VE: 288.6 K  
 D1: 1.0000000 sec  
 TDD: 1

CHANNEL f1  
 SFO1: 400.2324716 MHz  
 NUC1: 1H  
 P1: 14.33 usec  
 PLW1: 11.0000000 W

F2 - Processing parameters  
 SI: 65536  
 SF: 400.2300000 MHz  
 WDM: EM  
 LB: 0  
 GB: 0.30 Hz  
 PC: 1.00

MTZ-PZA-04

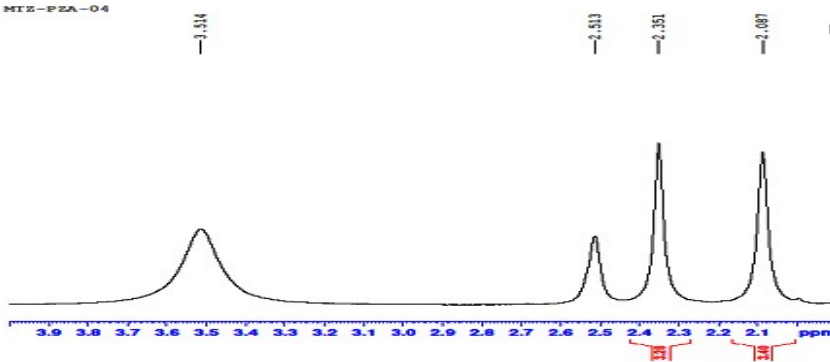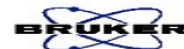

Current Data Parameters  
 NAME: MTZ-PZA-04  
 EXPNO: 1  
 PROCNO: 1

F2 - Acquisition Parameters  
 Date\_: 20140319  
 TIME: 15.05  
 INSTRUM: spect  
 PROBHD: 5 mm PABBO BB7  
 PULPROG: zgpg30  
 ID: 65536  
 SOLVENT: DMSO  
 NS: 16  
 DS: 2  
 SWH: 8012.820 Hz  
 FIDRES: 0.122266 Hz  
 AQ: 4.083463 sec  
 RG: 79.47  
 DW: 62.400 usec  
 DE: 6.50 usec  
 VE: 288.6 K  
 D1: 1.0000000 sec  
 TDD: 1

CHANNEL f1  
 SFO1: 400.2324716 MHz  
 NUC1: 1H  
 P1: 14.33 usec  
 PLW1: 11.0000000 W

F2 - Processing parameters  
 SI: 65536  
 SF: 400.2300000 MHz  
 WDM: EM  
 LB: 0  
 GB: 0.30 Hz  
 PC: 1.00

MTZ-PZA-04

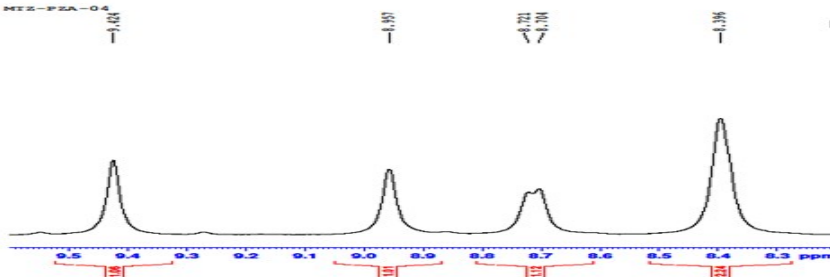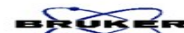

Current Data Parameters  
 NAME: MTZ-PZA-04  
 EXPNO: 1  
 PROCNO: 1

F2 - Acquisition Parameters  
 Date\_: 20140319  
 TIME: 15.05  
 INSTRUM: spect  
 PROBHD: 5 mm PABBO BB7  
 PULPROG: zgpg30  
 ID: 65536  
 SOLVENT: DMSO  
 NS: 16  
 DS: 2  
 SWH: 8012.820 Hz  
 FIDRES: 0.122266 Hz  
 AQ: 4.083463 sec  
 RG: 79.47  
 DW: 62.400 usec  
 DE: 6.50 usec  
 VE: 288.6 K  
 D1: 1.0000000 sec  
 TDD: 1

CHANNEL f1  
 SFO1: 400.2324716 MHz  
 NUC1: 1H  
 P1: 14.33 usec  
 PLW1: 11.0000000 W

F2 - Processing parameters  
 SI: 65536  
 SF: 400.2300000 MHz  
 WDM: EM  
 LB: 0  
 GB: 0.30 Hz  
 PC: 1.00

# <sup>13</sup>C NMR Spectrum of 5 (c)

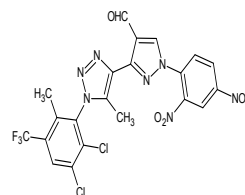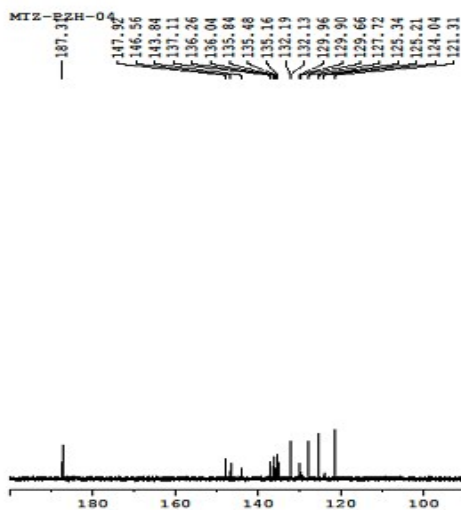

**BRUKER**

```

Current Data Parameters
NAME      MTX-P2H-04
EXPNO    1
PROCNO   1

F2 - Acquisition Parameters
Date_    201224
Time     13.44
INSTRUM  spect
PROBHD   5 mm PARBO Bb/
PULPROG  zgpg30
TD       65536
SOLVENT  CDCl3
NS       1024
DS       4
SWH      24038.461 Hz
FIDRES   0.366798 Hz
AQ       1.3631488 sec
RG       202.26
CW       20.800 usec
DE       6.50 usec
TE       295.2 K
D1       2.0000000 sec
d11      0.5300000 sec
TDO      1

===== CHANNEL f1 =====
SFO1     100.627169 MHz
NUC1     13C
P1       9.40 usec
PLM1     57.0000000 W

===== CHANNEL f2 =====
SFO2     400.2316009 MHz
NUC2     1H
CPDPRG2  waltz16
PCPD2    60.00 usec
PLM2     11.0000000 W
PLM12    0.2874999 W
PLM13    0.23287000 W

F2 - Processing parameters
SI       32768
SF       100.6379140 MHz
WDW      EM
SSB      0
GB       1.00 Hz
PC       1.40
    
```

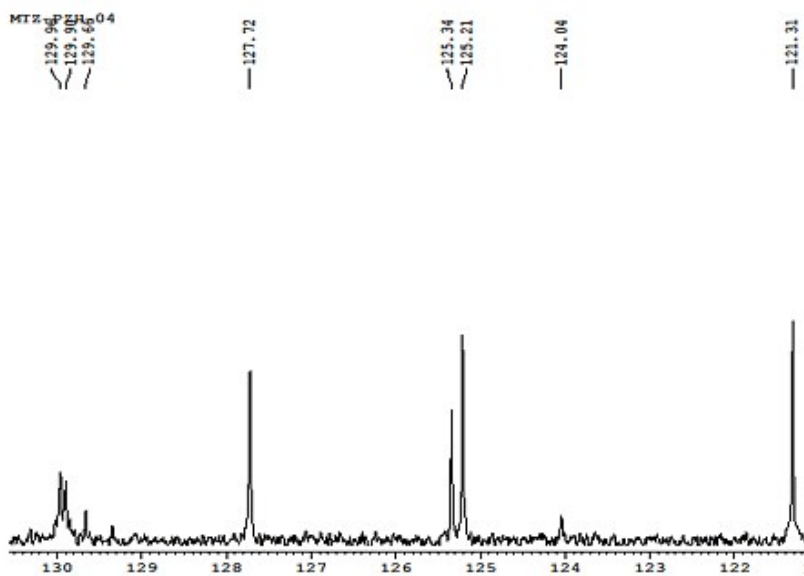

**BRUKER**

```

Current Data Parameters
NAME      MTX-P2H-04
EXPNO    1
PROCNO   1

F2 - Acquisition Parameters
Date_    201224
Time     13.44
INSTRUM  spect
PROBHD   5 mm PARBO Bb/
PULPROG  zgpg30
TD       65536
SOLVENT  CDCl3
NS       1024
DS       4
SWH      24038.461 Hz
FIDRES   0.366798 Hz
AQ       1.3631488 sec
RG       202.26
CW       20.800 usec
DE       6.50 usec
TE       295.2 K
D1       2.0000000 sec
d11      0.5300000 sec
TDO      1

===== CHANNEL f1 =====
SFO1     100.627169 MHz
NUC1     13C
P1       9.40 usec
PLM1     57.0000000 W

===== CHANNEL f2 =====
SFO2     400.2316009 MHz
NUC2     1H
CPDPRG2  waltz16
PCPD2    60.00 usec
PLM2     11.0000000 W
PLM12    0.2874999 W
PLM13    0.23287000 W

F2 - Processing parameters
SI       32768
SF       100.6379140 MHz
WDW      EM
SSB      0
GB       1.00 Hz
PC       1.40
    
```

MTZ-PZH-04

137.19  
136.26  
136.04  
135.84  
135.40  
135.16

132.19  
132.13

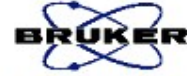

Current Data Parameters  
NAME MTZ-PZH-04  
EXPNO 1  
PROCNO 1

F2 - Acquisition Parameters  
Date\_ 20151224  
Time 13.44  
INSTRUM spect  
PROBHD 5 mm PABBO BB/  
PULPROG zgpg30  
TD 65536  
SOLVENT CDCl3  
NS 1024  
DS 4  
SWH 24038.461 Hz  
FIDRES 0.366798 Hz  
AQ 1.3631488 sec  
RG 202.26  
SQ 20.800 usec  
DE 6.50 usec  
TE 295.0 K  
SI 2.0000000 sec  
D11 0.0300000 sec  
TD0 1

----- CHANNEL f1 -----  
SFO1 100.6279769 MHz  
NUC1 13C  
P1 9.40 usec  
P1M1 57.0000000 W

----- CHANNEL f2 -----  
SFO2 400.2316009 MHz  
NUC2 1H  
CPOBPG12 waltz16  
PCPD2 90.00 usec  
P1M2 11.0000000 W  
P1M12 0.28749999 W  
P1M13 0.23287000 W

F2 - Processing parameters  
SI 32768  
SF 100.6379140 MHz  
WDW EM  
SSB 0  
LB 1.00 Hz  
GB 0  
PC 1.40

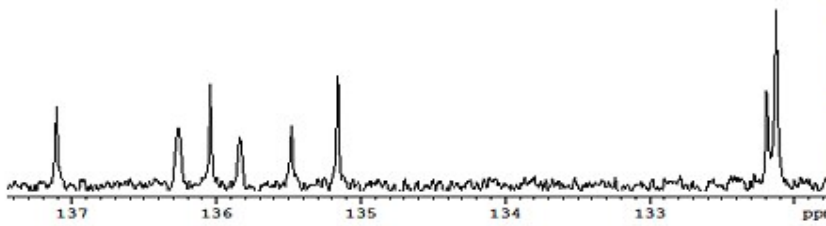

MTZ-PZH-04

147.92  
146.56

143.84

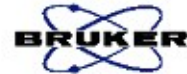

Current Data Parameters  
NAME MTZ-PZH-04  
EXPNO 1  
PROCNO 1

F2 - Acquisition Parameters  
Date\_ 20151224  
Time 13.44  
INSTRUM spect  
PROBHD 5 mm PABBO BB/  
PULPROG zgpg30  
TD 65536  
SOLVENT CDCl3  
NS 1024  
DS 4  
SWH 24038.461 Hz  
FIDRES 0.366798 Hz  
AQ 1.3631488 sec  
RG 202.26  
SQ 20.800 usec  
DE 6.50 usec  
TE 295.0 K  
SI 2.0000000 sec  
D11 0.0300000 sec  
TD0 1

----- CHANNEL f1 -----  
SFO1 100.6279769 MHz  
NUC1 13C  
P1 9.40 usec  
P1M1 57.0000000 W

----- CHANNEL f2 -----  
SFO2 400.2316009 MHz  
NUC2 1H  
CPOBPG12 waltz16  
PCPD2 90.00 usec  
P1M2 11.0000000 W  
P1M12 0.28749999 W  
P1M13 0.23287000 W

F2 - Processing parameters  
SI 32768  
SF 100.6379140 MHz  
WDW EM  
SSB 0  
LB 1.00 Hz  
GB 0  
PC 1.40

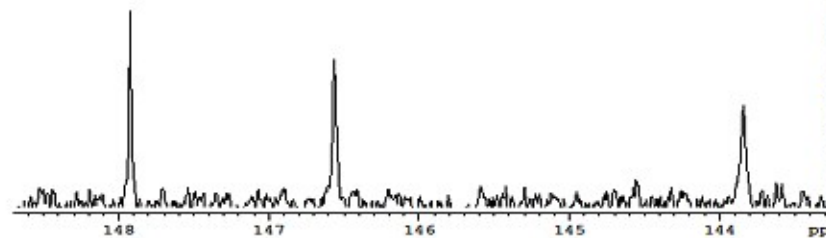

## Mass spectrum of 5 (c)

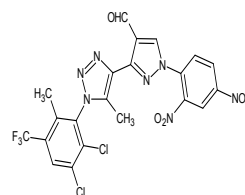

$m/z = 570.3$

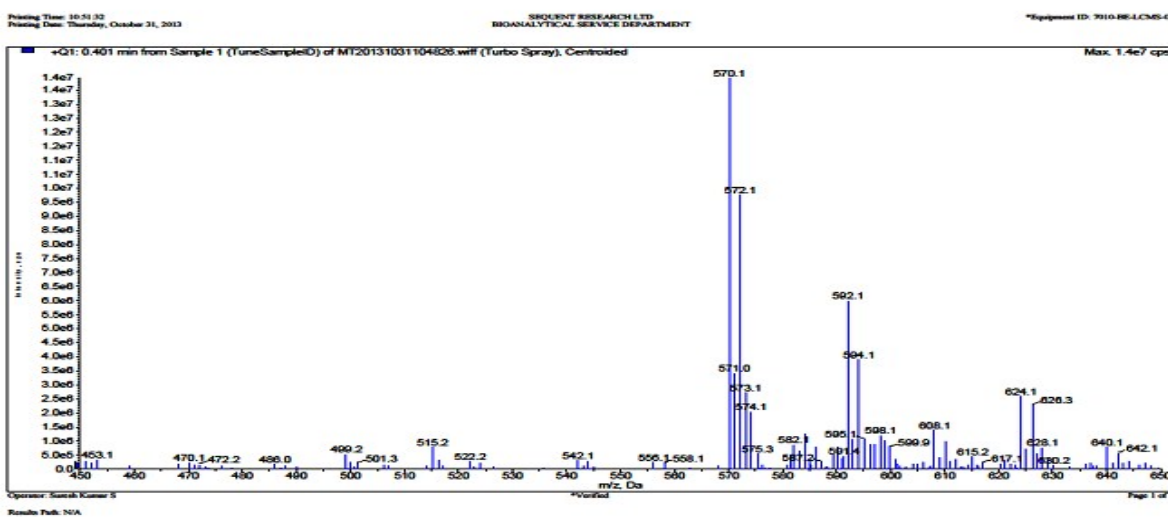

## IR spectrum of 5 (c)

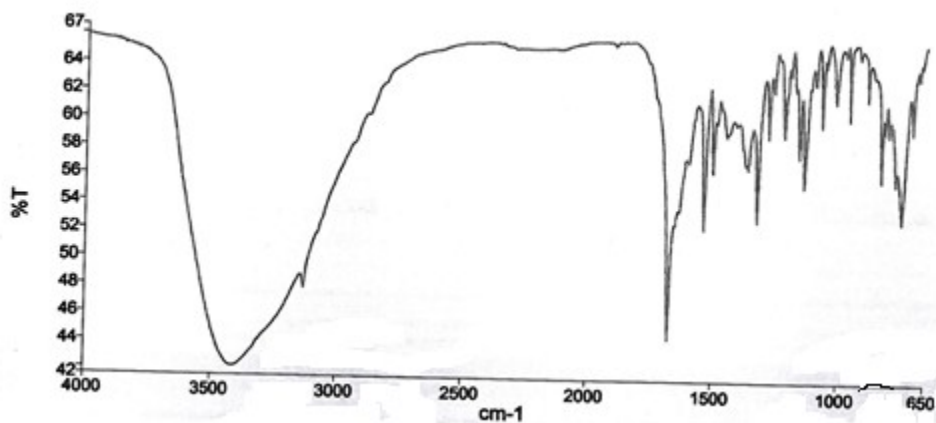

# <sup>1</sup>H NMR Spectrum of 5 (f)

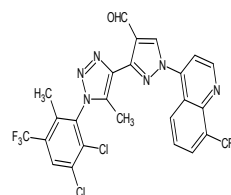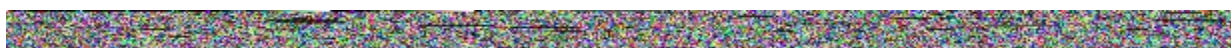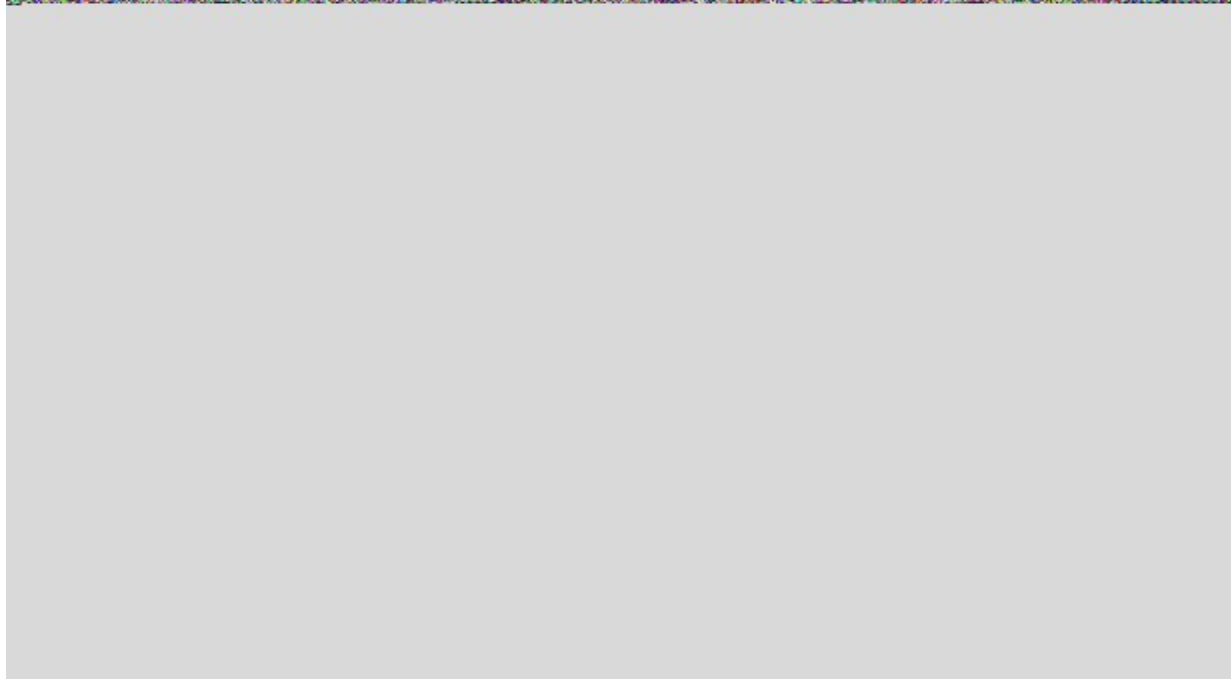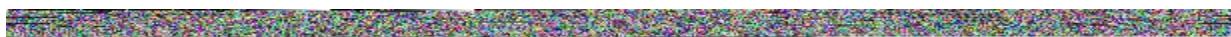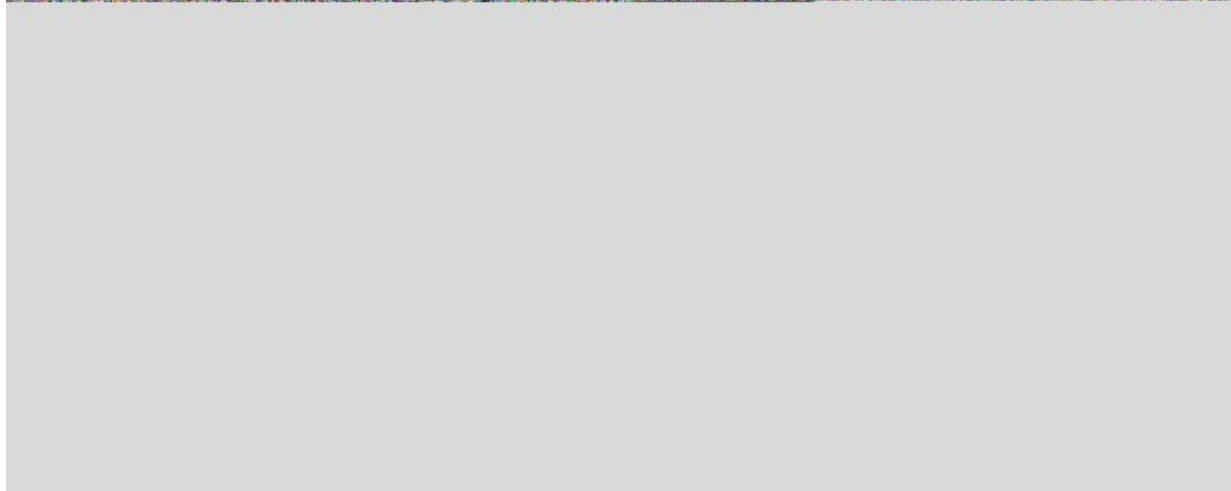

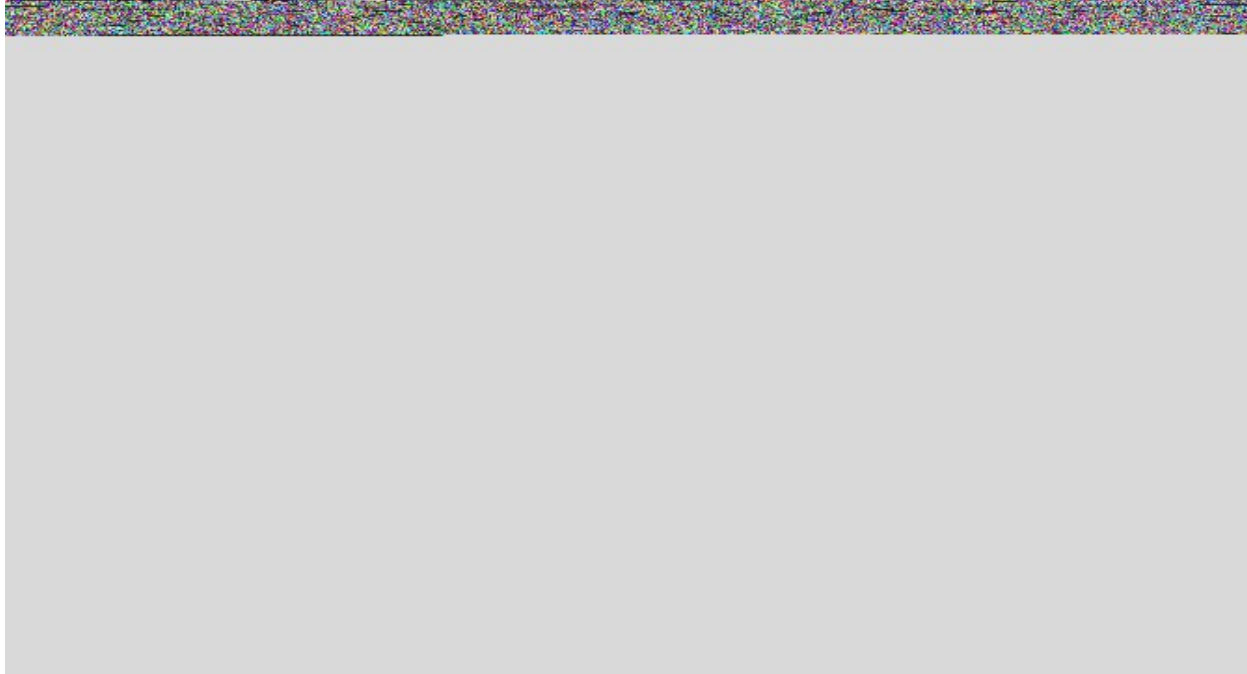

### <sup>13</sup>C NMR Spectrum of 5 (f)

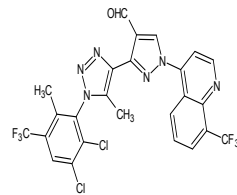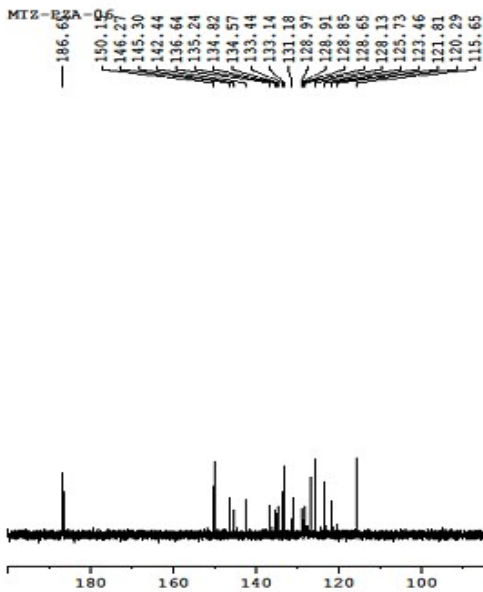

**BRUKER**

Current Data Parameters  
NAME: N12-P1A-C6  
EXPNO: 2  
PROCNO: 1

F2 - Acquisition Parameters  
Date\_: 20151226  
Time: 14.30  
INSTRUM: spect  
PROBHD: 5 mm PABBO MM7  
PULPROG: zgpg30  
TD: 65536  
SOLVENT: CDCl3  
NS: 1024  
DS: 4  
SWH: 24038.461 Hz  
FIDRES: 0.366798 Hz  
AQ: 1.3631488 sec  
RG: 202.26  
CW: 20.800 usec  
DE: 6.50 usec  
TE: 295.2 K  
D1: 2.0000000 sec  
D11: 0.0300000 sec  
TD0: 1

----- CHANNEL f1 -----  
SFO1: 100.6279769 MHz  
NUC1: 13C  
P1: 9.40 usec  
PLM1: 57.0000000 W

----- CHANNEL f2 -----  
SFO2: 400.2316009 MHz  
NUC2: 1H  
CPOPRG[2]: waltz16  
PCPD2: 90.00 usec  
P1M2: 11.0000000 W  
P1M12: 0.2874999 W  
P1M13: 0.23287000 W

F2 - Processing parameters  
SI: 32768  
SF: 100.6380175 MHz  
WDW: EM  
SSB: 0  
LB: 1.00 Hz  
GB: 0  
PC: 1.40



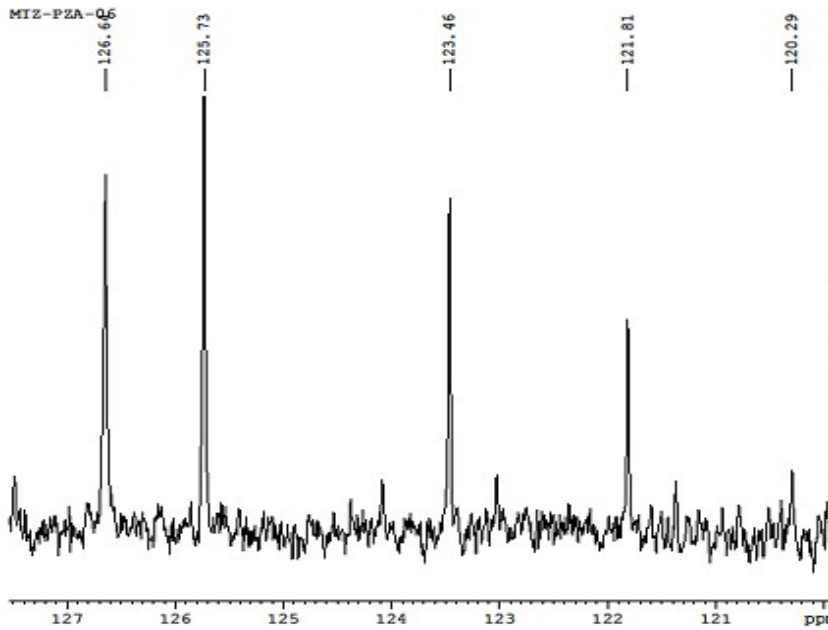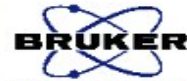

Current Data Parameters  
 NAME MIZ-PZA-06  
 EXPNO 2  
 PROCNO 1

F2 - Acquisition Parameters  
 Date\_ 2011226  
 Time 14.10  
 INSTRUM spect  
 PROBRD 5 mm PABBO BB/ spect30  
 PULPROG zgpg30  
 TD 65536  
 SOLVENT CDCl3  
 NS 1024  
 DS 4  
 SWH 24038.461 Hz  
 FIDRES 0.366798 Hz  
 AQ 1.3631488 sec  
 RG 202.26  
 CW 20.800 usec  
 DE 6.50 usec  
 TE 295.2 K  
 D1 2.0000000 sec  
 D11 0.0300000 sec  
 TDD 1

----- CHANNEL F1 -----  
 SFO1 100.6479769 MHz  
 NUC1 13C  
 P1 9.40 usec  
 P1M1 57.0000000 W

----- CHANNEL F2 -----  
 SFO2 400.2316009 MHz  
 NUC2 1H  
 CPOPRG2 waltz16  
 PCPD2 90.00 usec  
 PPM2 11.0000000 W  
 P1M2 0.28749999 W  
 P1M3 0.23287000 W

F2 - Processing parameters  
 SI 32768  
 SF 100.6380175 MHz  
 NTH 8M  
 SSB 0  
 LB 1.00 Hz  
 GB 0  
 PC 1.40

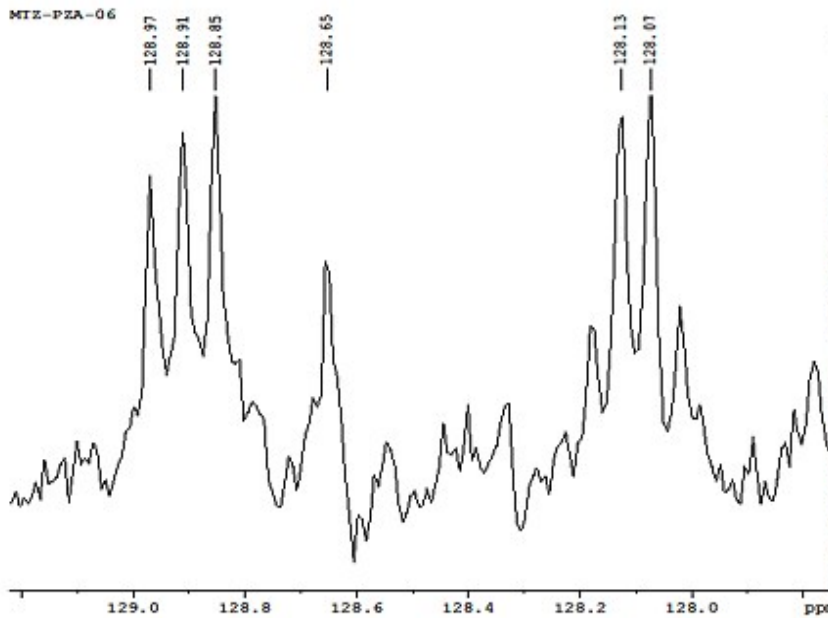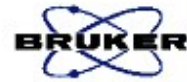

Current Data Parameters  
 NAME MIZ-PZA-06  
 EXPNO 2  
 PROCNO 1

F2 - Acquisition Parameters  
 Date\_ 2011226  
 Time 14.10  
 INSTRUM spect  
 PROBRD 5 mm PABBO BB/ spect30  
 PULPROG zgpg30  
 TD 65536  
 SOLVENT CDCl3  
 NS 1024  
 DS 4  
 SWH 24038.461 Hz  
 FIDRES 0.366798 Hz  
 AQ 1.3631488 sec  
 RG 202.26  
 CW 20.800 usec  
 DE 6.50 usec  
 TE 295.2 K  
 D1 2.0000000 sec  
 D11 0.0300000 sec  
 TDD 1

----- CHANNEL F1 -----  
 SFO1 100.6479769 MHz  
 NUC1 13C  
 P1 9.40 usec  
 P1M1 57.0000000 W

----- CHANNEL F2 -----  
 SFO2 400.2316009 MHz  
 NUC2 1H  
 CPOPRG2 waltz16  
 PCPD2 90.00 usec  
 PPM2 11.0000000 W  
 P1M2 0.28749999 W  
 P1M3 0.23287000 W

F2 - Processing parameters  
 SI 32768  
 SF 100.6380175 MHz  
 NTH 8M  
 SSB 0  
 LB 1.00 Hz  
 GB 0  
 PC 1.40

MTZ-PZA-06

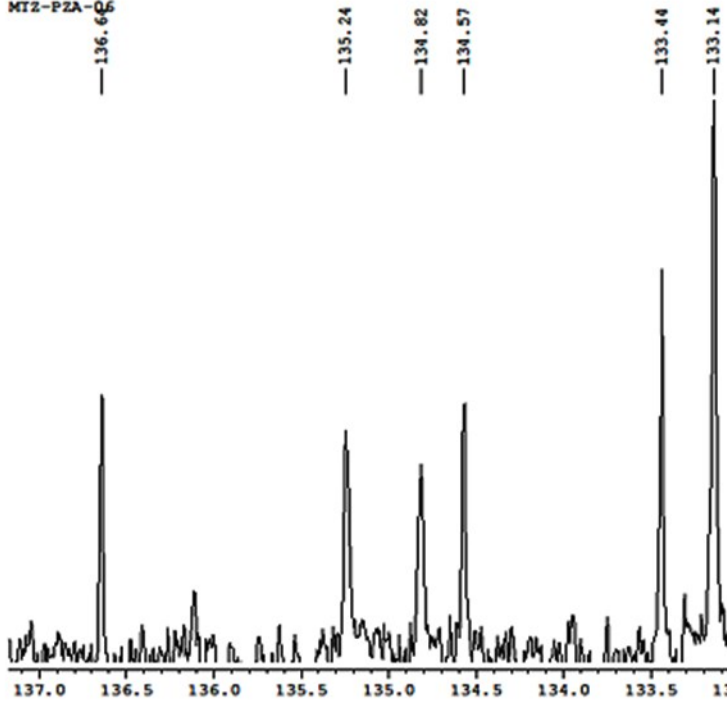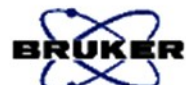

Current Data Parameters  
 NAME MTZ-PZA-06  
 EXPNO 2  
 PROCNO 1

F2 - Acquisition Parameters  
 Date\_ 20151226  
 Time 14.10  
 INSTRUM spect  
 PULPROG 5 mm PABBO 90/  
 FULPROG zgpg30  
 TD 65536  
 SOLVENT CDCl3  
 NS 1024  
 DS 4  
 SWH 24038.461 Hz  
 FIDRES 0.366798 Hz  
 AQ 1.3631488 sec  
 RG 202.26  
 DW 20.800 usec  
 DE 6.50 usec  
 TE 295.2 K  
 D1 2.0000000 sec  
 D11 0.0300000 sec  
 TD0 1

==== CHANNEL f1 =====  
 SF01 100.6479769 MHz  
 NUQ1 13C  
 P1 9.40 usec  
 P1M1 57.0000000 W

==== CHANNEL f2 =====  
 SF02 400.2316009 MHz  
 NUQ2 1H  
 CPDPRG2 waltz16  
 PCPD2 90.00 usec  
 P1M2 11.0000000 W  
 P1M12 0.28749999 W  
 P1M13 0.23287000 W

F2 - Processing parameters  
 SI 32768  
 SF 100.6380175 MHz  
 SW 2M  
 SSB 0  
 LB 1.00 Hz  
 GB 0  
 PC 1.40

MTZ-PZA-06

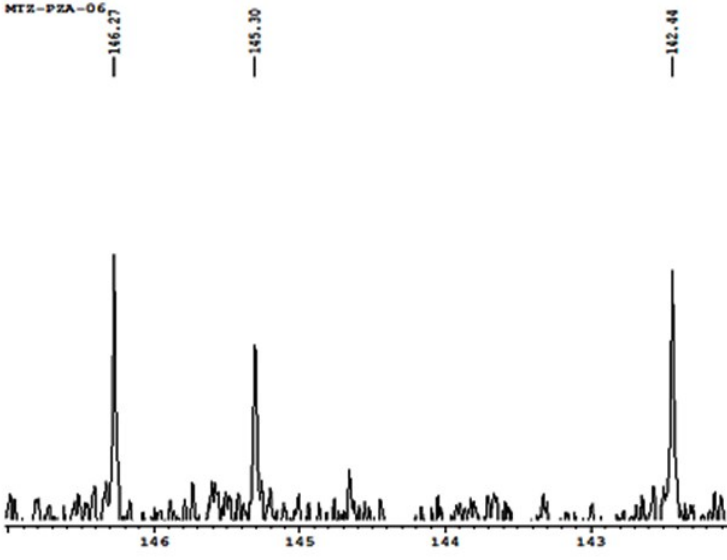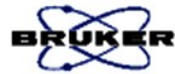

Current Data Parameters  
 NAME MTZ-PZA-06  
 EXPNO 2  
 PROCNO 1

F2 - Acquisition Parameters  
 Date\_ 20151226  
 Time 14.10  
 INSTRUM spect  
 PULPROG 5 mm PABBO 90/  
 FULPROG zgpg30  
 TD 65536  
 SOLVENT CDCl3  
 NS 1024  
 DS 4  
 SWH 24038.461 Hz  
 FIDRES 0.366798 Hz  
 AQ 1.3631488 sec  
 RG 202.26  
 DW 20.800 usec  
 DE 6.50 usec  
 TE 295.2 K  
 D1 2.0000000 sec  
 D11 0.0300000 sec  
 TD0 1

==== CHANNEL f1 =====  
 SF01 100.6479769 MHz  
 NUQ1 13C  
 P1 9.40 usec  
 P1M1 57.0000000 W

==== CHANNEL f2 =====  
 SF02 400.2316009 MHz  
 NUQ2 1H  
 CPDPRG2 waltz16  
 PCPD2 90.00 usec  
 P1M2 11.0000000 W  
 P1M12 0.28749999 W  
 P1M13 0.23287000 W

F2 - Processing parameters  
 SI 32768  
 SF 100.6380175 MHz  
 SW 2M  
 SSB 0  
 LB 1.00 Hz  
 GB 0  
 PC 1.40

## Mass spectrum of 5 (f)

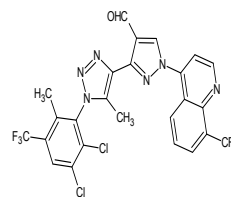

$m/z = 599.3$

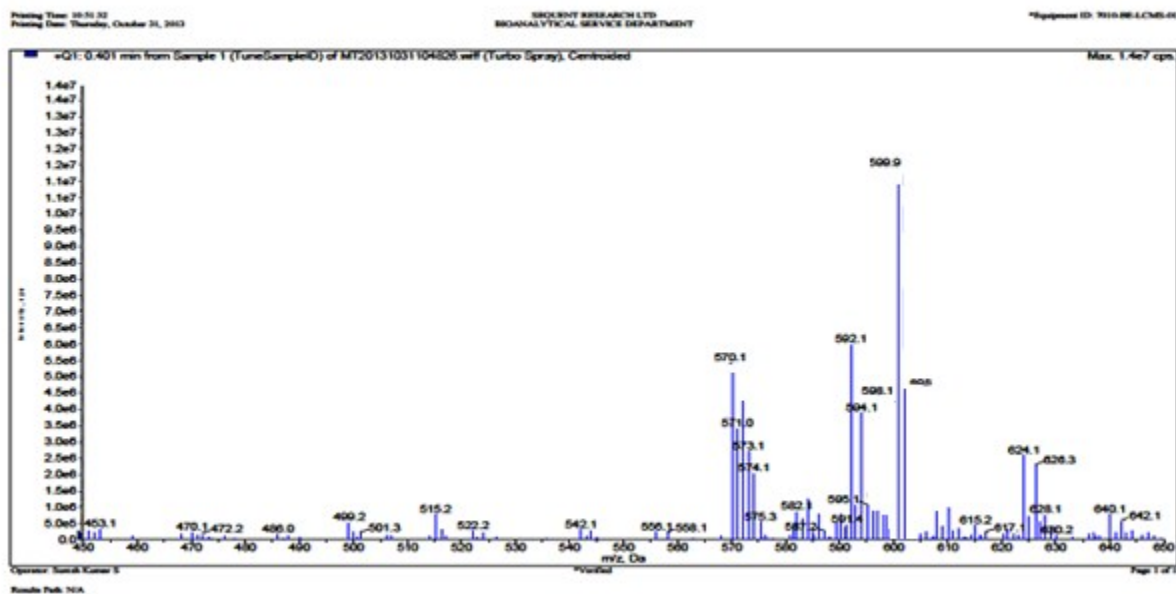

## IR spectrum of 5 (f)

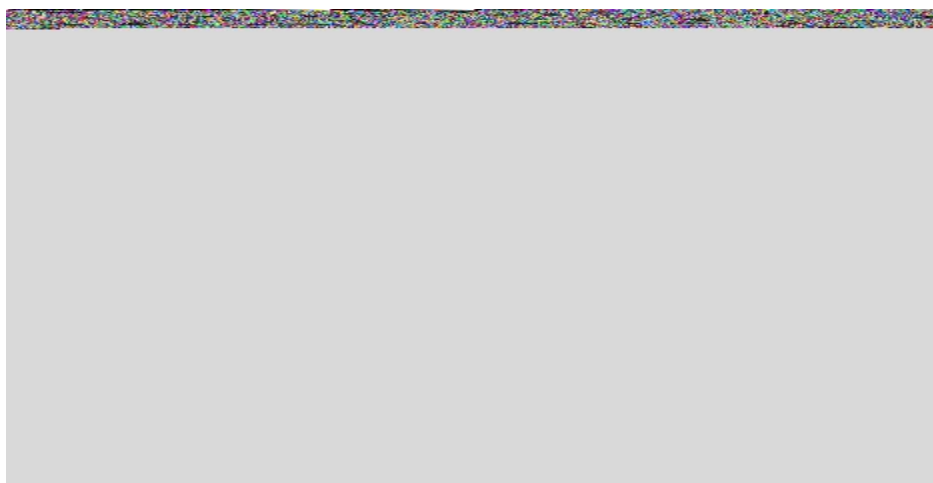

<sup>1</sup>H NMR Spectrum of 5 (b)

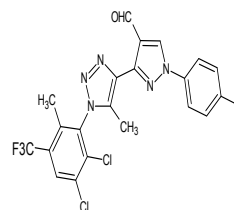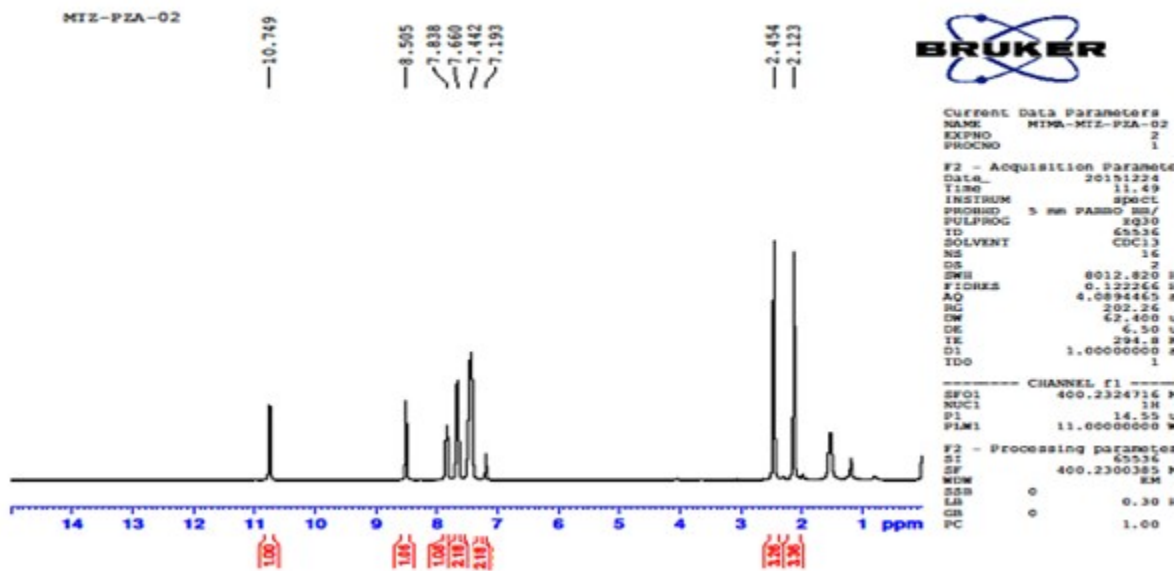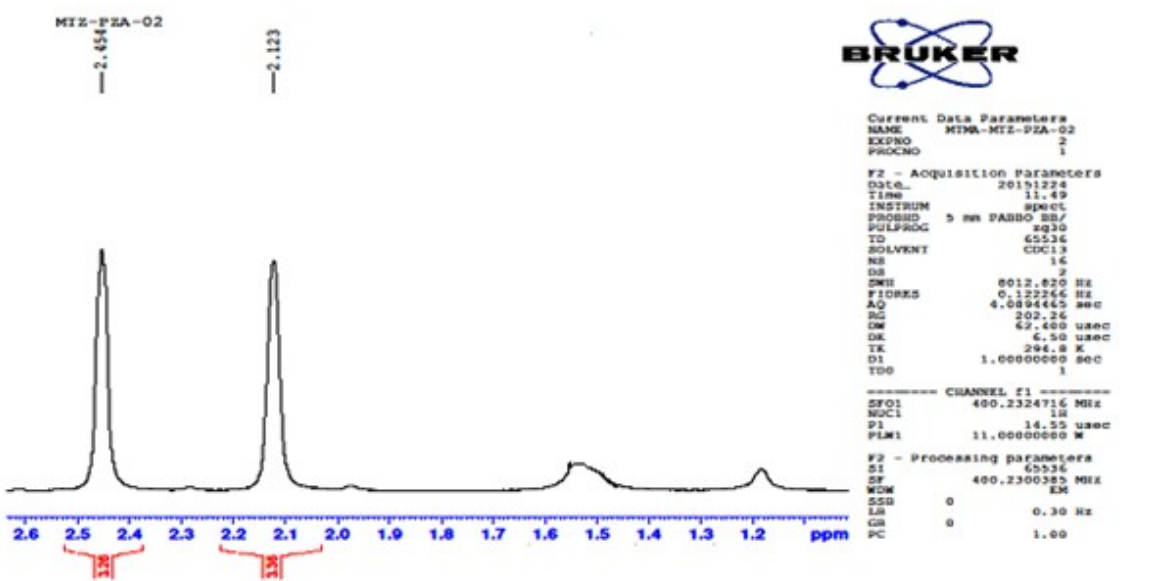

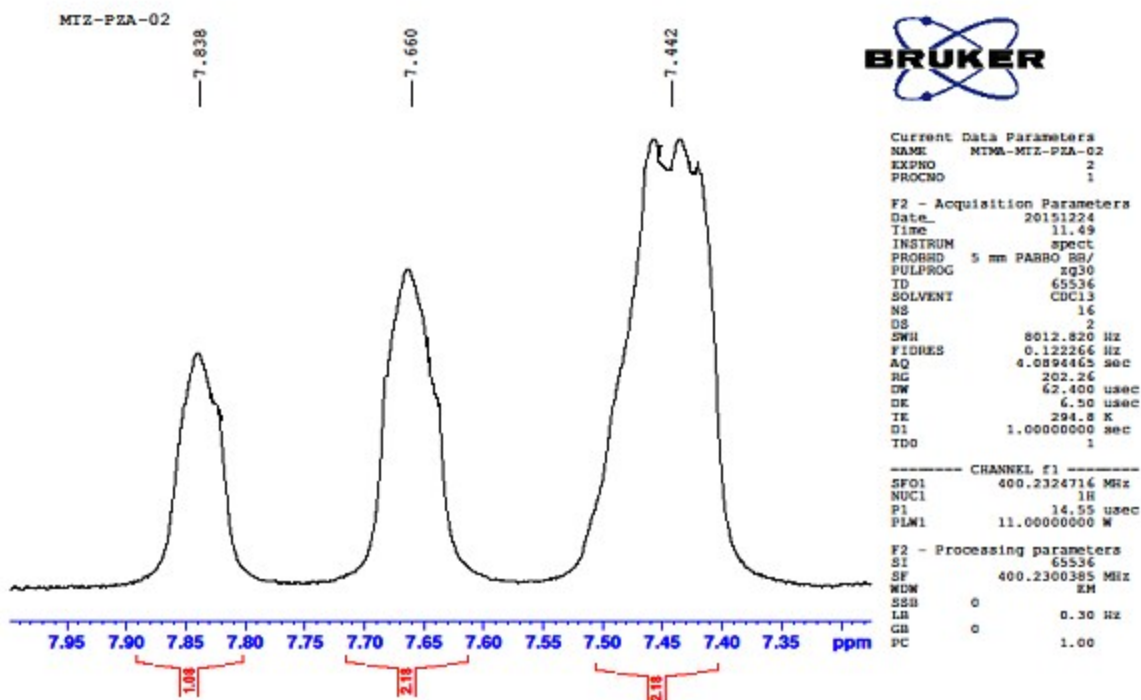

<sup>13</sup>C NMR Spectrum of 5 (b)

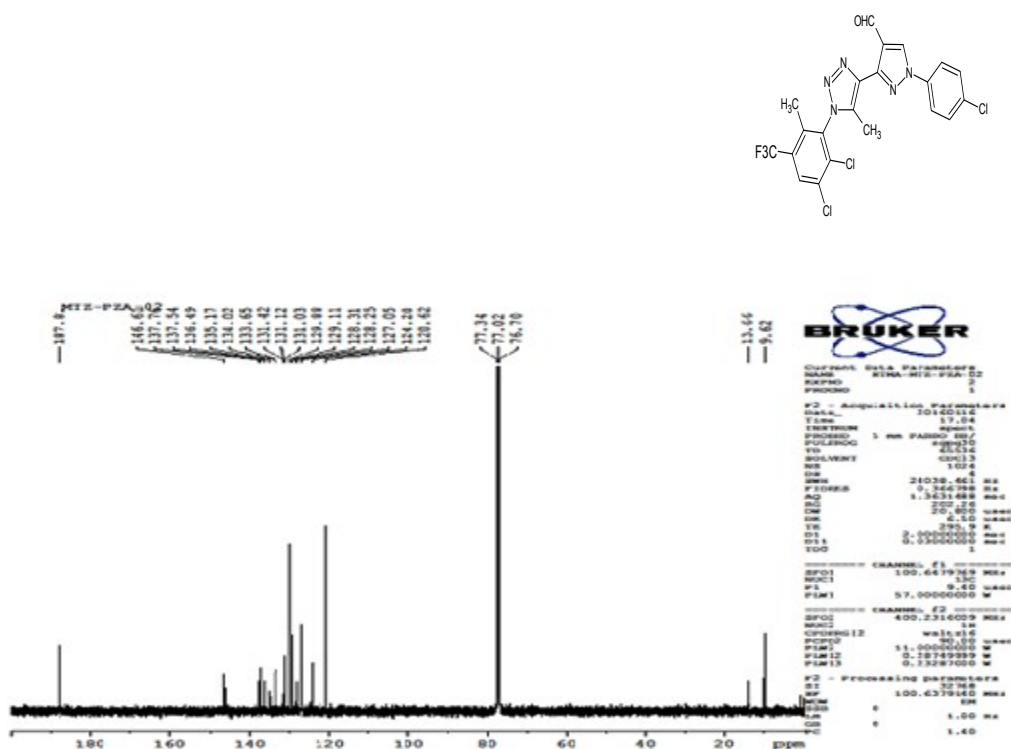

## Mass spectrum of 5 (b)

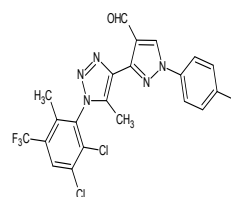

$m/z = 514.7$

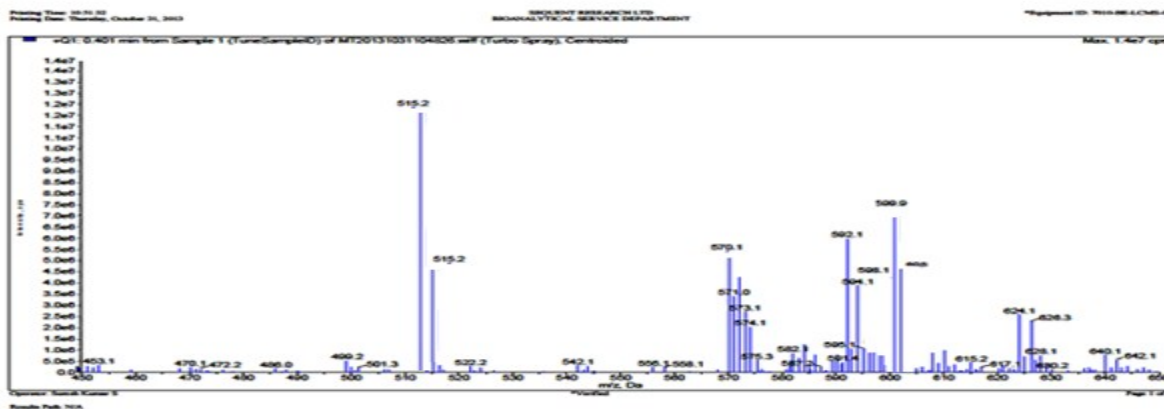

## IR spectrum of 5 (b)

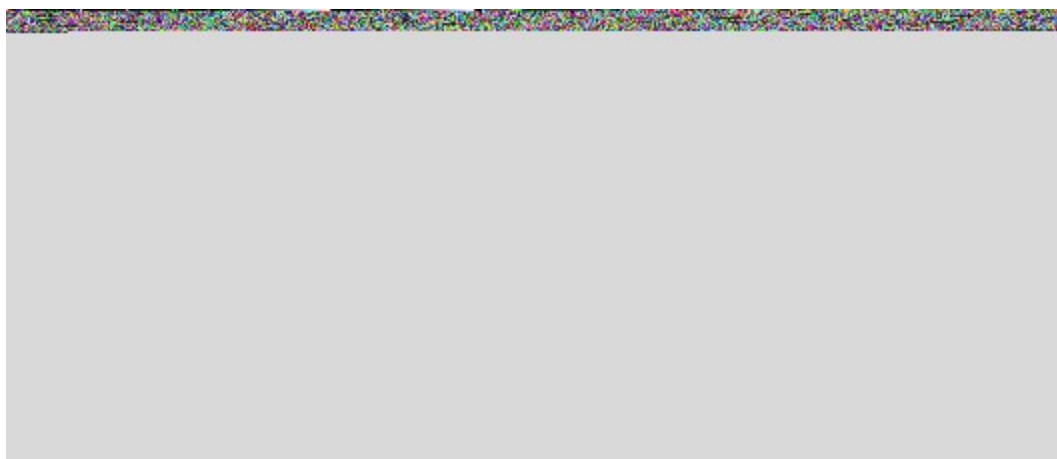

<sup>1</sup>H NMR Spectrum of 5 (g)

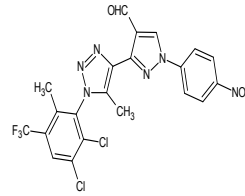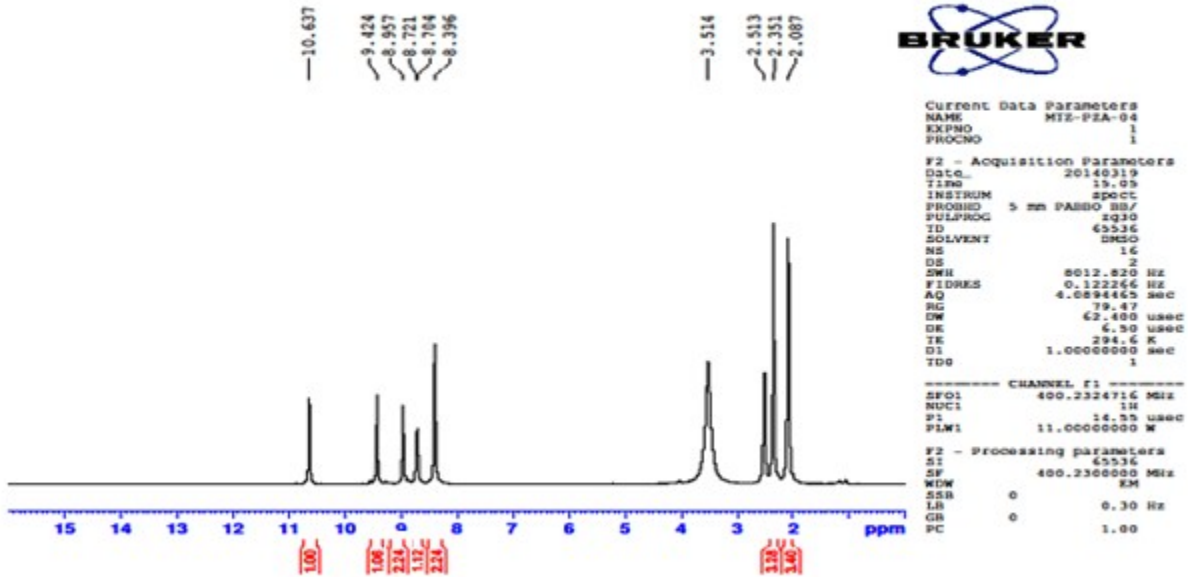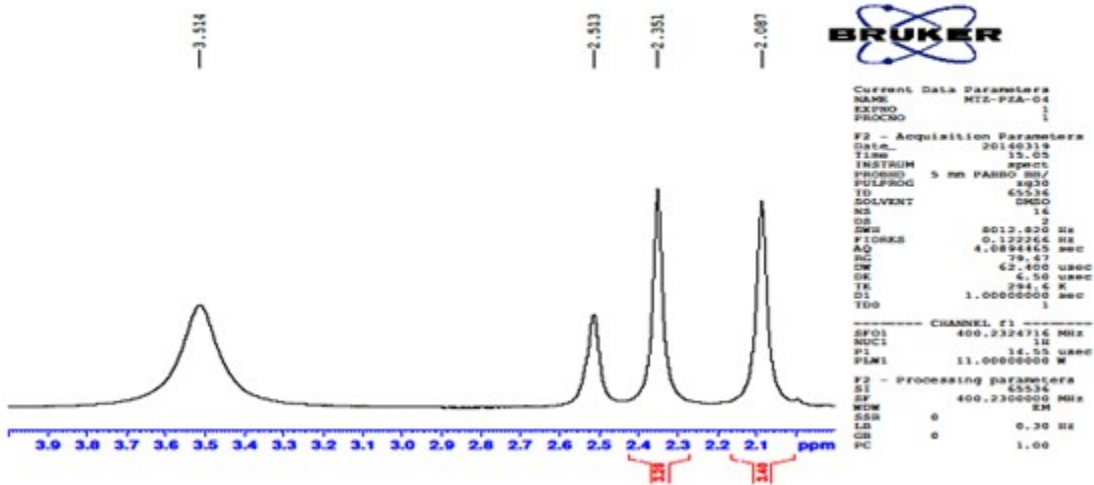

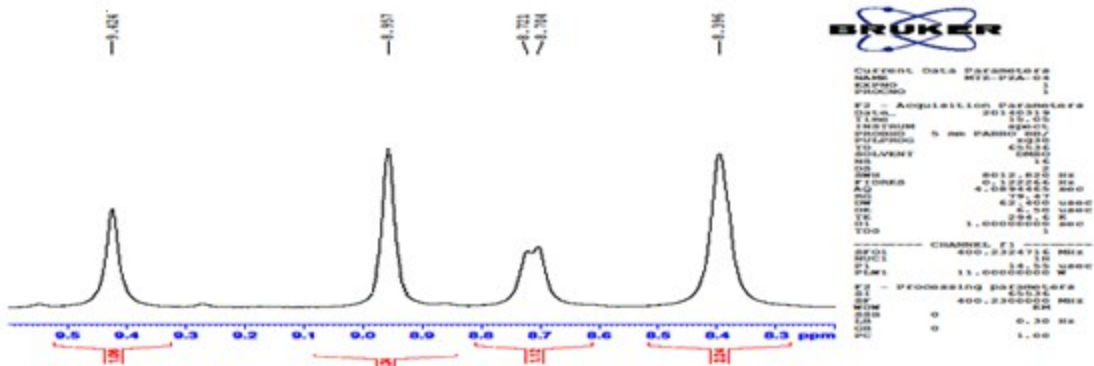

<sup>13</sup>C NMR Spectrum of 5 (g)

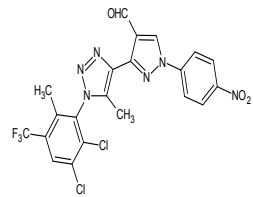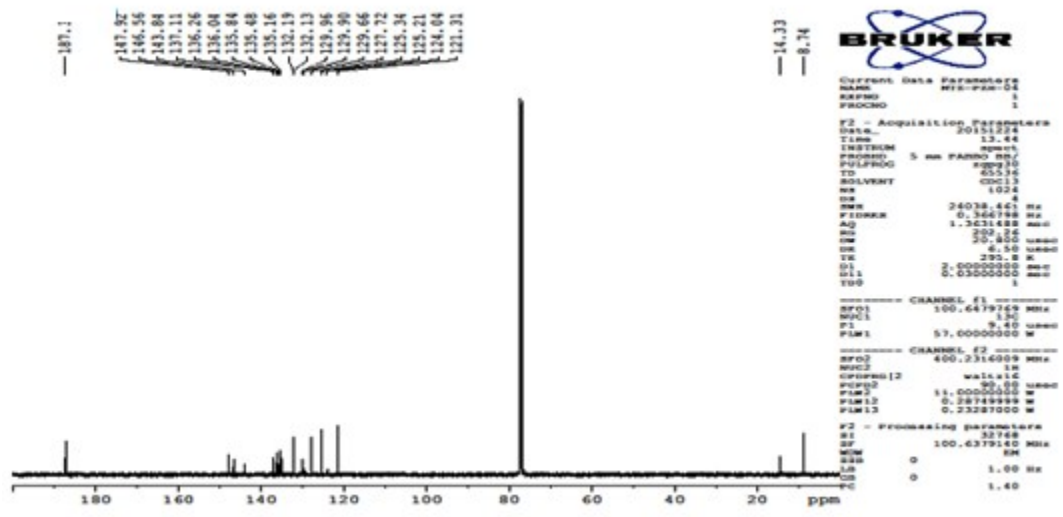



## Mass spectrum of 5 (g)

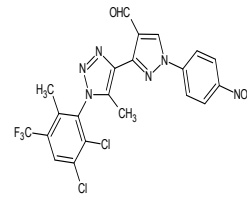

$m/z = 525.6$

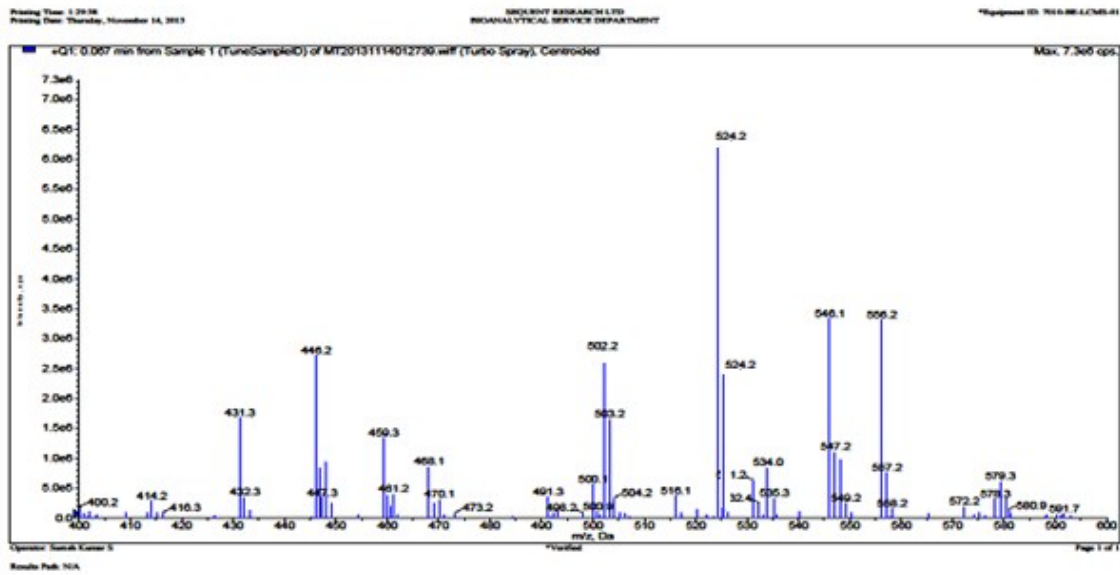

## IR spectrum of 5 (g)

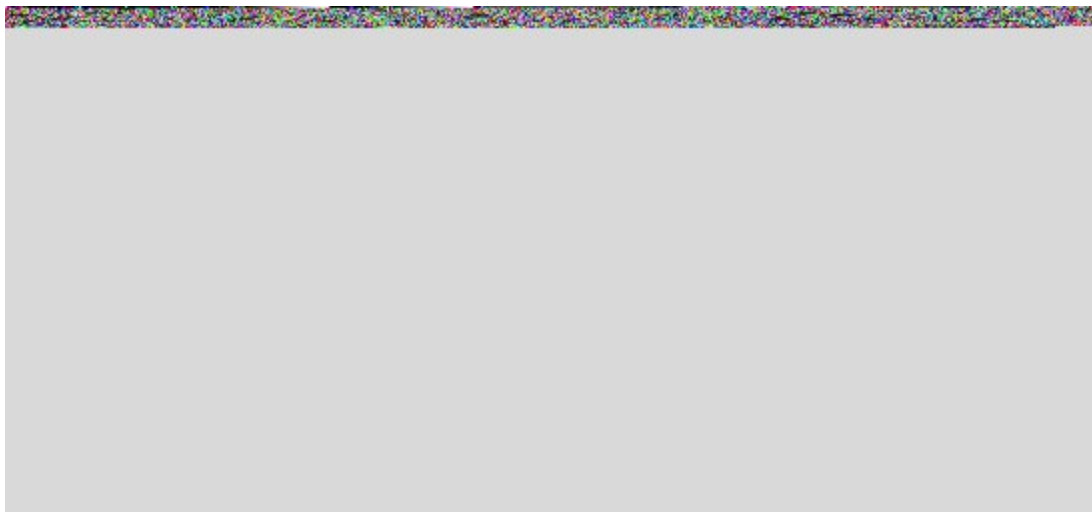

# <sup>1</sup>H NMR Spectrum of 5 (a)

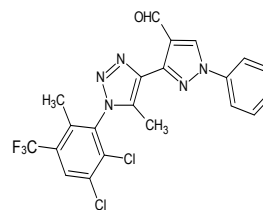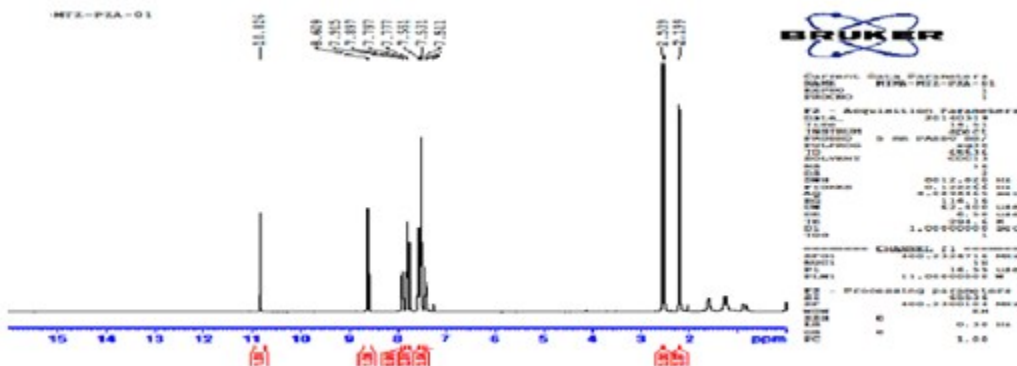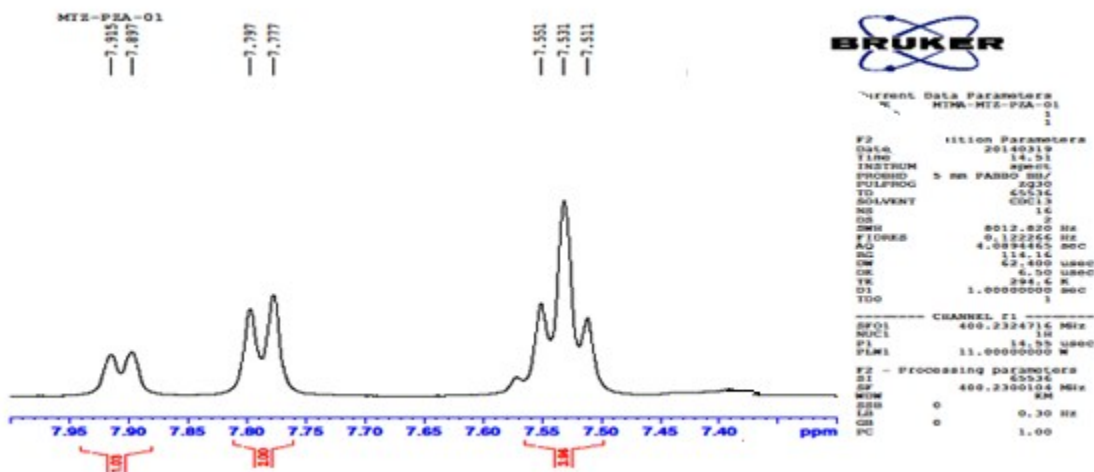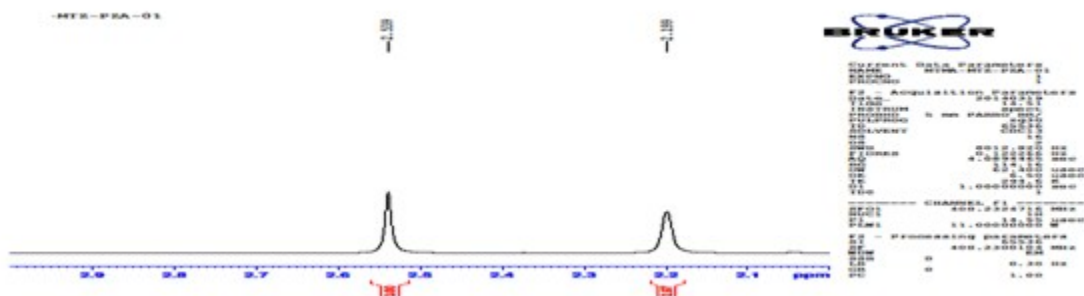

# <sup>13</sup>C NMR Spectrum of 5 (a)

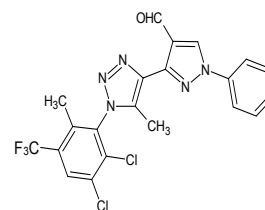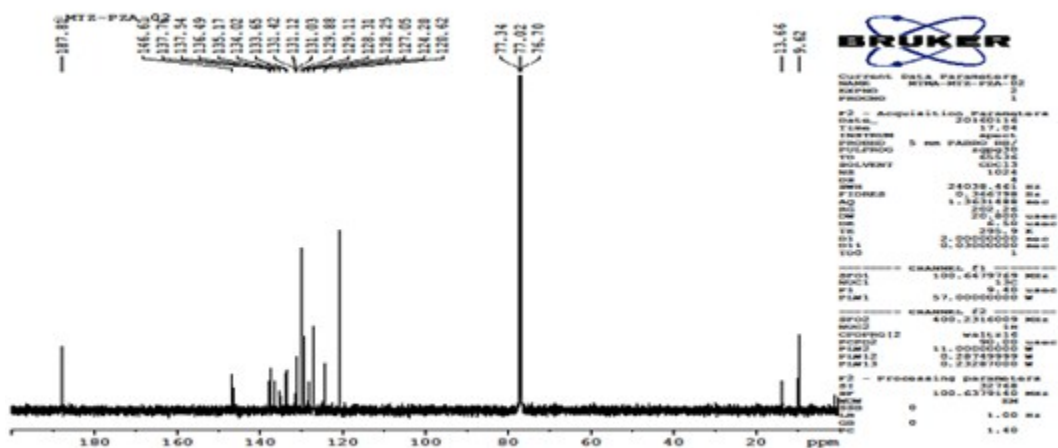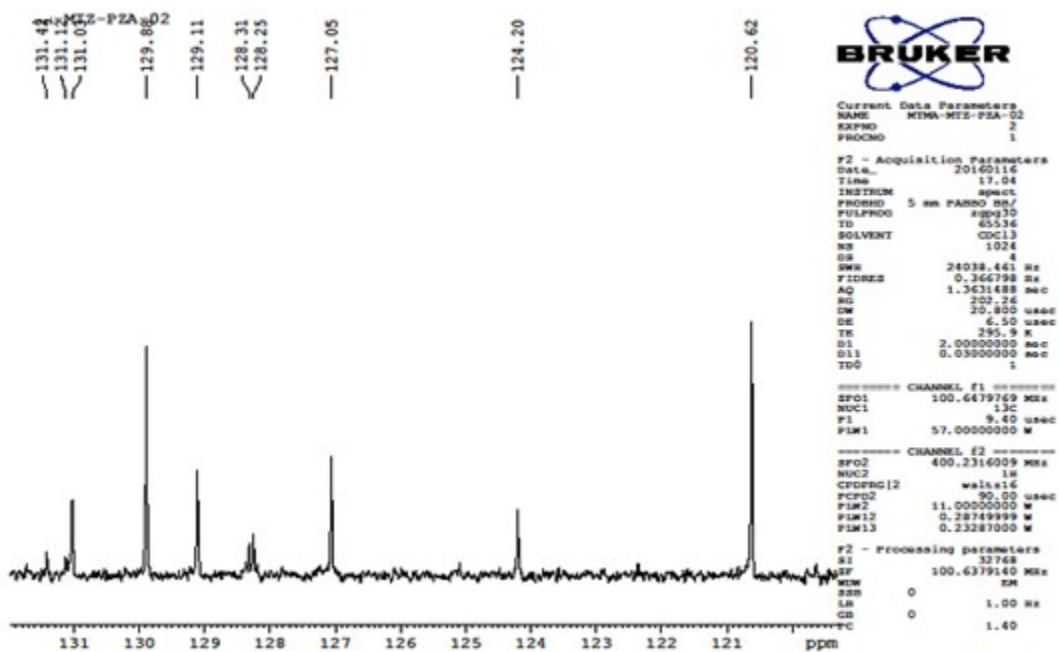

## Mass spectrum of 5 (a)

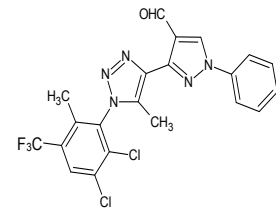

$m/z = 480.2$

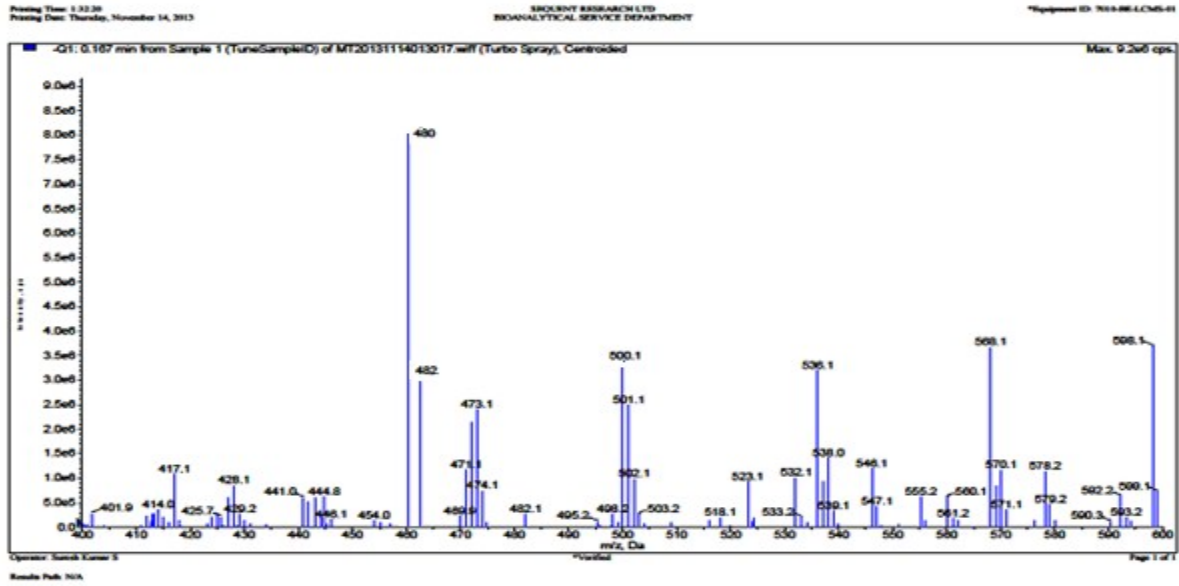

## IR Spectrum of 5 (a)

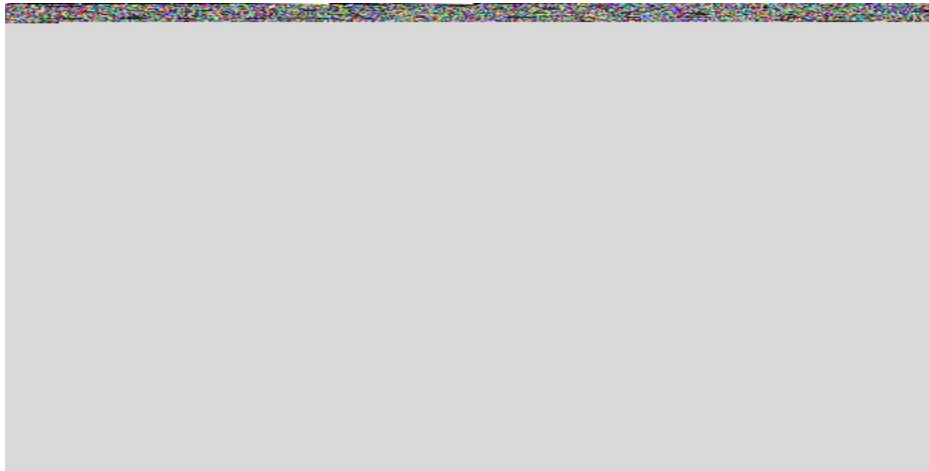

### $^1\text{H}$ NMR Spectrum of 3 ( $\text{R}_1=\text{R}_2=\text{Cl}$ )

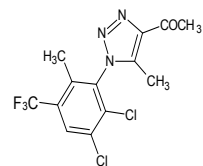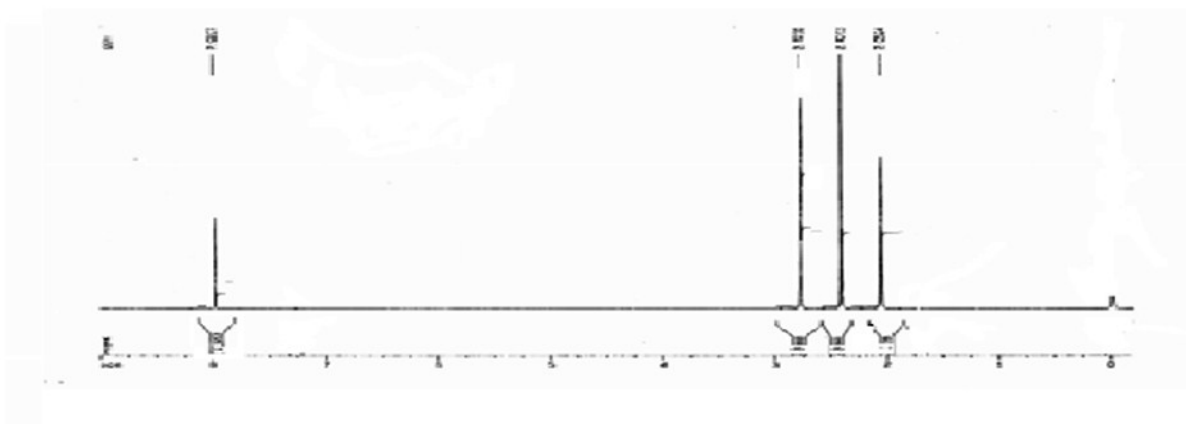

### $^{13}\text{C}$ NMR Spectrum of 3 ( $\text{R}_1=\text{R}_2=\text{Cl}$ )

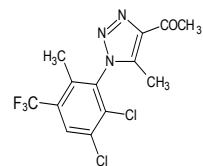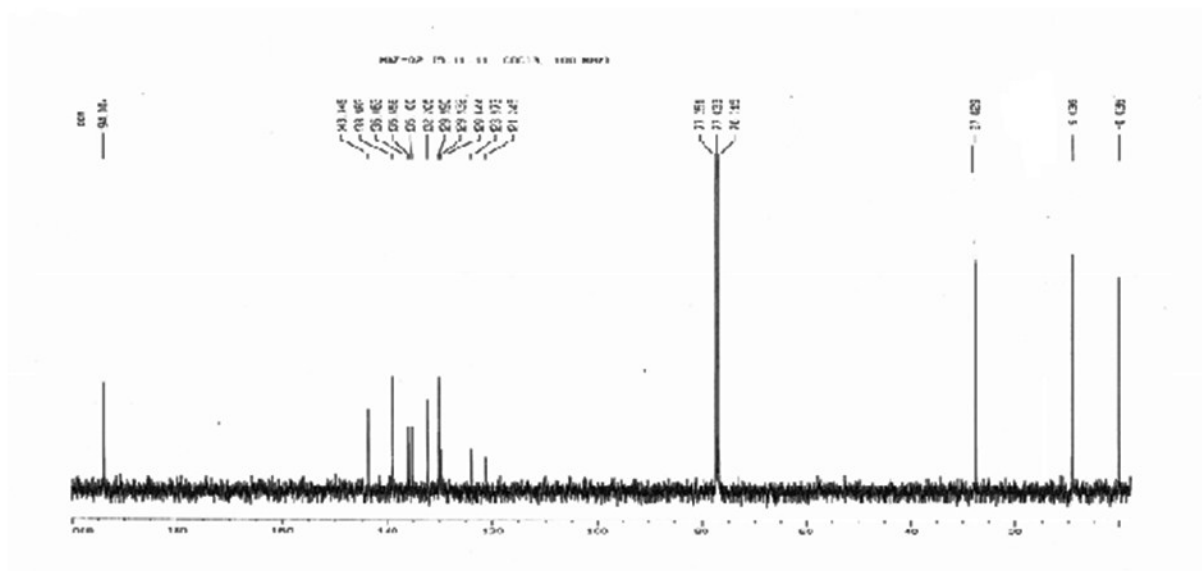

## Mass spectrum of 3 (R<sub>1</sub>=R<sub>2</sub>= Cl)

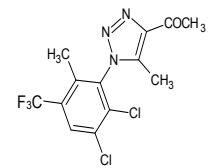

**m/z = 352.2**

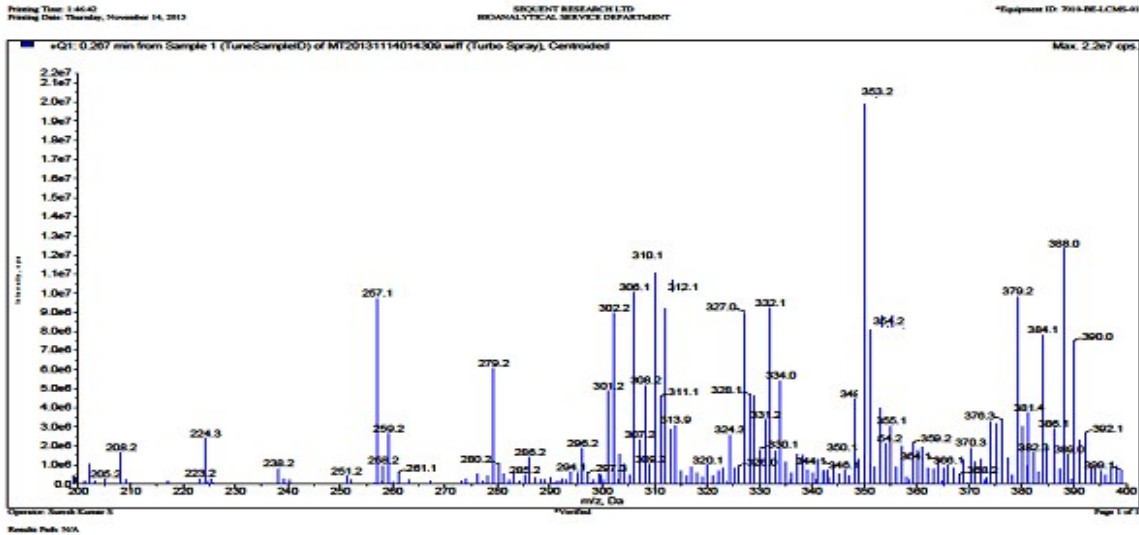

## <sup>1</sup>H NMR Spectrum of 3 (R<sub>1</sub>=R<sub>2</sub>= H)

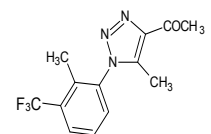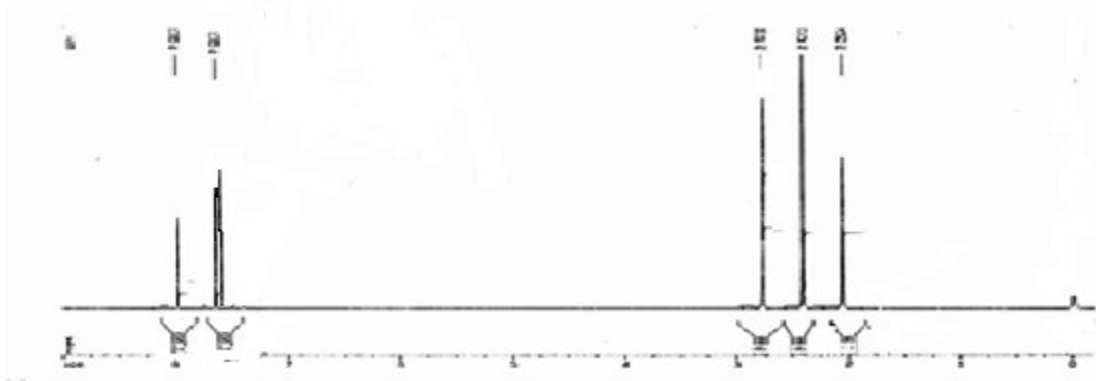

### $^{13}\text{C}$ NMR Spectrum of 3 ( $\text{R}_1=\text{R}_2=\text{H}$ )

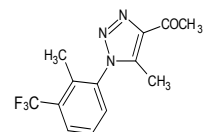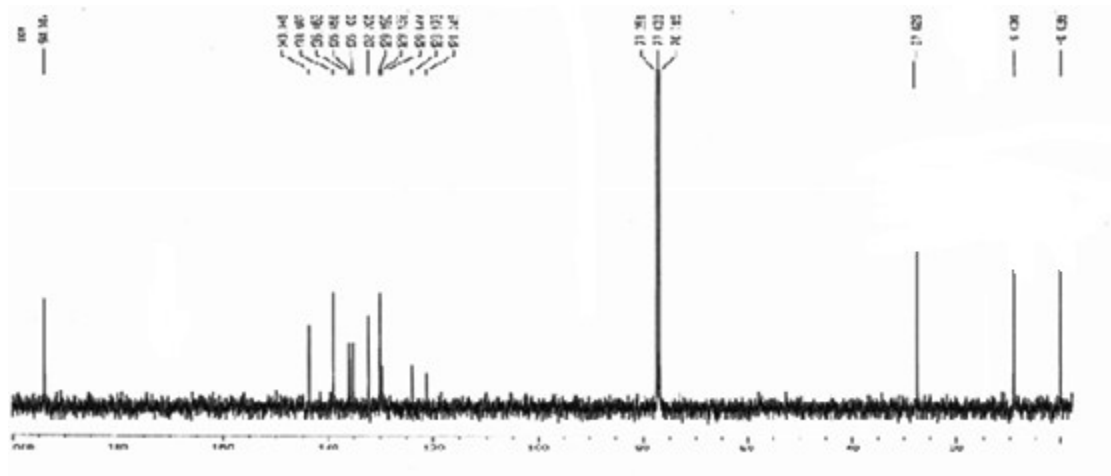

### Mass spectrum of 3 ( $\text{R}_1=\text{R}_2=\text{H}$ )

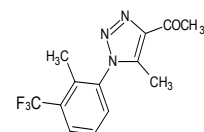

$m/z = 283.2$

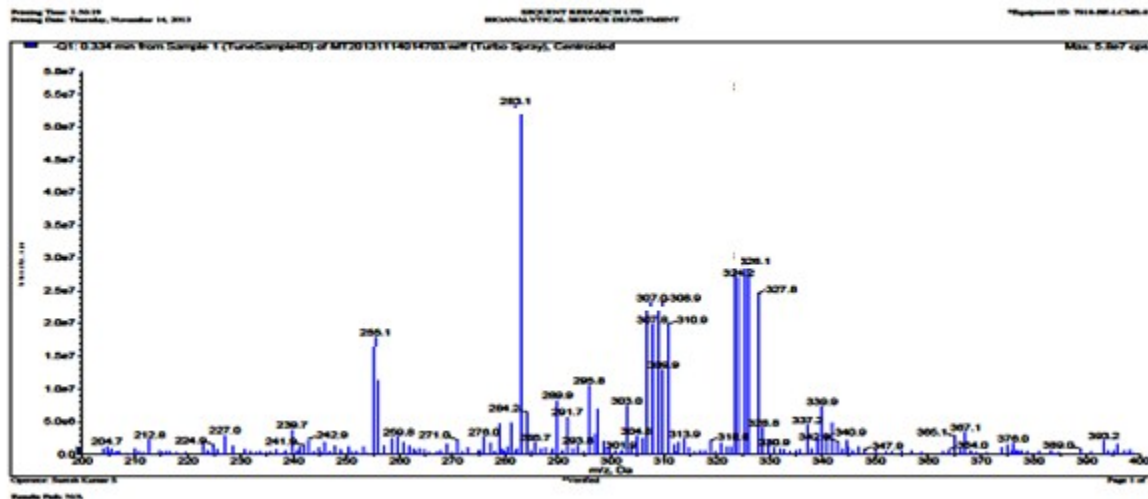

Supplement: c6ra06093e1.pdf [file c6ra06093e1.pdf]
